# Supplementary material for: Clinical outcomes and factors associated with pulmonary infarction following acute pulmonary embolism: a retrospective observational study at a US academic centre
Source: PubMed Central journal article supplement — BMJ Open. 2022 Dec 29;12(12):e067579. doi: 10.1136/bmjopen-2022-067579 (PMC9806066; doi:10.1136/bmjopen-2022-067579), 2022-12-29
Supplement: bmjopen-2022-067579.draft_revisions.pdf [file bmjopen-2022-067579.draft_revisions.pdf]

# BMJ Open

BMJ Open is committed to open peer review. As part of this commitment we make the peer review history of every article we publish publicly available.

When an article is published we post the peer reviewers' comments and the authors' responses online. We also post the versions of the paper that were used during peer review. These are the versions that the peer review comments apply to.

The versions of the paper that follow are the versions that were submitted during the peer review process. They are not the versions of record or the final published versions. They should not be cited or distributed as the published version of this manuscript.

BMJ Open is an open access journal and the full, final, typeset and author-corrected version of record of the manuscript is available on our site with no access controls, subscription charges or pay-per-view fees (<http://bmjopen.bmj.com>).

If you have any questions on BMJ Open's open peer review process please email [info.bmjopen@bmj.com](mailto:info.bmjopen@bmj.com)

# BMJ Open

## Clinical Relevance of Pulmonary Infarction Following Acute Pulmonary Embolism

|                               |                                                                                                                                                                                                                                                                                                                                                                                                                                                                                                                                                                                                                                                                                                                                                                                                                                                  |
|-------------------------------|--------------------------------------------------------------------------------------------------------------------------------------------------------------------------------------------------------------------------------------------------------------------------------------------------------------------------------------------------------------------------------------------------------------------------------------------------------------------------------------------------------------------------------------------------------------------------------------------------------------------------------------------------------------------------------------------------------------------------------------------------------------------------------------------------------------------------------------------------|
| Journal:                      | <i>BMJ Open</i>                                                                                                                                                                                                                                                                                                                                                                                                                                                                                                                                                                                                                                                                                                                                                                                                                                  |
| Manuscript ID                 | bmjopen-2022-067579                                                                                                                                                                                                                                                                                                                                                                                                                                                                                                                                                                                                                                                                                                                                                                                                                              |
| Article Type:                 | Original research                                                                                                                                                                                                                                                                                                                                                                                                                                                                                                                                                                                                                                                                                                                                                                                                                                |
| Date Submitted by the Author: | 19-Aug-2022                                                                                                                                                                                                                                                                                                                                                                                                                                                                                                                                                                                                                                                                                                                                                                                                                                      |
| Complete List of Authors:     | Lio, Ka U; Lewis Katz School of Medicine at Temple University, Department of Medicine<br>O'Corragain, Oisin; Lewis Katz School of Medicine at Temple University, Department of Thoracic Medicine and Surgery<br>Bashir, Riyaz ; Lewis Katz School of Medicine at Temple University, Cardiology<br>Brosnahan, Shari; NYU Langone Health, Pulmonary, Critical Care and Sleep Medicine<br>Cohen, Gary; Lewis Katz School of Medicine at Temple University, Radiology<br>Lakhter, Vladimir; Lewis Katz School of Medicine at Temple University, Cardiology<br>Panaro, Joseph; Lewis Katz School of Medicine at Temple University, Radiology<br>Rivera-Lebron, B; University of Pittsburgh School of Medicine, Pulmonary and Critical Care Medicine<br>Rali, Parth; Lewis Katz School of Medicine at Temple University, Thoracic Medicine and Surgery |
| Keywords:                     | Thromboembolism < CARDIOLOGY, RESPIRATORY MEDICINE (see Thoracic Medicine), Thoracic medicine < INTERNAL MEDICINE                                                                                                                                                                                                                                                                                                                                                                                                                                                                                                                                                                                                                                                                                                                                |
|                               |                                                                                                                                                                                                                                                                                                                                                                                                                                                                                                                                                                                                                                                                                                                                                                                                                                                  |

SCHOLARONE™  
Manuscripts

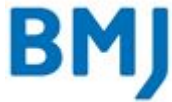

I, the Submitting Author has the right to grant and does grant on behalf of all authors of the Work (as defined in the below author licence), an exclusive licence and/or a non-exclusive licence for contributions from authors who are: i) UK Crown employees; ii) where BMJ has agreed a CC-BY licence shall apply, and/or iii) in accordance with the terms applicable for US Federal Government officers or employees acting as part of their official duties; on a worldwide, perpetual, irrevocable, royalty-free basis to BMJ Publishing Group Ltd ("BMJ") its licensees and where the relevant Journal is co-owned by BMJ to the co-owners of the Journal, to publish the Work in this journal and any other BMJ products and to exploit all rights, as set out in our [licence](#).

The Submitting Author accepts and understands that any supply made under these terms is made by BMJ to the Submitting Author unless you are acting as an employee on behalf of your employer or a postgraduate student of an affiliated institution which is paying any applicable article publishing charge ("APC") for Open Access articles. Where the Submitting Author wishes to make the Work available on an Open Access basis (and intends to pay the relevant APC), the terms of reuse of such Open Access shall be governed by a Creative Commons licence – details of these licences and which [Creative Commons](#) licence will apply to this Work are set out in our licence referred to above.

Other than as permitted in any relevant BMJ Author's Self Archiving Policies, I confirm this Work has not been accepted for publication elsewhere, is not being considered for publication elsewhere and does not duplicate material already published. I confirm all authors consent to publication of this Work and authorise the granting of this licence.

## Clinical Relevance of Pulmonary Infarction Following Acute Pulmonary Embolism

Ka U Lio<sup>1</sup>, Oisin O'Corragain<sup>2</sup>, Riyaz Bashir<sup>3</sup>, Shari Brosnahan<sup>4</sup>, Gary Cohen<sup>5</sup>, Vladimir Lakhter<sup>3</sup>, Joseph Panaro<sup>5</sup>, Belinda Rivera-Lebron<sup>6</sup>, Parth Rali<sup>2</sup>

1 Department of Medicine, Lewis Katz School of Medicine at Temple University, Philadelphia, PA, United States

2 Department of Thoracic Medicine and Surgery, Lewis Katz School of Medicine at Temple University, Philadelphia, PA, United States

3 Division of Cardiovascular Diseases, Lewis Katz School of Medicine at Temple University, Philadelphia, PA, United States

4 Division of Pulmonary, Critical Care and Sleep Medicine, New York University School of Medicine, New York, NY, United States

5 Department of Radiology, Lewis Katz School of Medicine at Temple University, Philadelphia, PA, United States

6 Division of Pulmonary and Critical Care Medicine, University of Pittsburgh Medical Center, Pittsburgh, PA, United States

### Corresponding author:

Ka U Lio, MD

Department of Medicine, Lewis Katz School of Medicine at Temple University

3401 N Broad Street, Philadelphia, PA 19140

Phone: +1-267-541-9536

Fax number: +1-267-460-3850

Email: [kau.lio@thus.temple.edu](mailto:kau.lio@thus.temple.edu)

**Word count:** 2312 words

1  
2  
3 **Keywords:** pulmonary embolism, pulmonary infarction, venous thromboembolism, shortness of  
4  
5 breath, pleuritic chest pain  
6

7 **Abbreviations:** BNP= B-type natriuretic peptide; CDT= catheter-directed thrombolysis; CKD=  
8  
9 chronic kidney disease; CT= computed tomography; CTPA= computed tomography pulmonary  
10  
11 angiography; PA= pulmonary artery; PE= Pulmonary embolism; RV= Right ventricular; sPESI=  
12  
13 simplified pulmonary embolism severity index  
14  
15  
16  
17  
18  
19  
20  
21  
22  
23  
24  
25  
26  
27  
28  
29  
30  
31  
32  
33  
34  
35  
36  
37  
38  
39  
40  
41  
42  
43  
44  
45  
46  
47  
48  
49  
50  
51  
52  
53  
54  
55  
56  
57  
58  
59  
60

## Abstract

**Objective:** Pulmonary infarction is a common clinical and radiographic finding in acute pulmonary embolism (PE), yet the clinical relevance and prognostic significance of pulmonary infarction remain unclear. The study aims to investigate the clinical features, radiographic characteristics, impact of reperfusion therapy, and outcomes of patients with pulmonary infarction.

**Design, setting and participants:** A retrospective cohort study of 496 adult patients ( $\geq 18$  years of age) diagnosed with PE who were evaluated by the pulmonary embolism response team (PERT) at a tertiary academic referral center in the US. We collected baseline characteristics, laboratory, radiographic, and outcome data. Statistical analysis was performed by Student t-test, Mann-Whitney U test, Fischer's exact or  $X^2$  test where appropriate. Multivariate logistic regression was used to evaluate potential risk factors for pulmonary infarction.

**Results:** We identified 143 (29%) cases of pulmonary infarction in 496 patients with PE. Patients with infarction were significantly younger ( $52 \pm 15.9$  vs.  $61 \pm 16.6$  years,  $p < 0.001$ ) and with fewer comorbidities. Most infarction occurred in the lower lobes (60%) and involved a single lobe (64%). The presence of right ventricular (RV) strain on computed tomography (CT) imaging was significantly higher in patients with infarction (21% vs 14%,  $p = 0.031$ ). There was no significant difference in advanced reperfusion therapy, in-hospital mortality, length of stay, and readmission between groups. In multivariate analysis, age, and evidence of RV strain on CT and hemoptysis increased the risk of infarction.

**Conclusions:** Radiographic evidence of pulmonary infarction was demonstrated in nearly one-third of patients with acute PE. There was no difference in the rate of reperfusion therapies and the presence of infarction did not correlate with poorer outcomes.

**Strengths and limitations of this study:**

- Acute pulmonary embolism (PE) is a leading cause of cardiovascular death globally, this study assessed the clinical characteristics and prognostic significance of pulmonary infarction, which is a common complication following PE.
- Our study highlighted the potential role of pulmonary infarction in the risk stratification of acute PE, since the presence of infarction was not associated with poorer outcomes, it should not be considered a supporting factor nor a contraindication for advanced reperfusion therapy for PE.
- Limitations: Cases of pulmonary infarction were identified based on CT findings and there was no histological correlation to differentiate between true necrosis (infarction) versus alveolar hemorrhage. Due to the retrospective nature of this study, not all patients underwent CT imaging post-discharge and thus we were unable to comment on the precise timing of resolution of infarction and its long-term significance.

## Introduction

Acute pulmonary embolism (PE) is the third leading cause of cardiovascular death following myocardial infarction and stroke, with approximately 100,000 annual deaths in the United States (1, 2). Pulmonary infarction is a common complication of acute PE with a reported radiographic prevalence of up to 36% (3). The dual blood supply of lungs has been thought to be protective against ischemic insults, with the bronchial circulation and other collateral vessels undergoing hypertrophy or remodeling to maintain blood flow to ischemic lung tissues through anastomoses at the level of alveoli and respiratory bronchioles (4, 5). Nevertheless, obstruction of the pulmonary artery by acute PE can cause infarction. In the past, the presence of infarction has been regarded as a sign of poor outcomes due to its association with compromised cardiac function, which leads to increased pulmonary venous pressure and impairment of forwarding flow through the bronchial circulation (6, 7). Contrarily, recent studies have suggested that younger, healthier patients are at the highest risk for infarction, because of their less robust collateral blood supply (8, 9). The clinical relevance and prognostic significance of pulmonary infarction remain unclear. The aim of this study is to investigate the clinical features, radiographic characteristics, impact of reperfusion therapy, and outcomes of patients with pulmonary infarction.

## Methods

### Study population

We conducted a single-center retrospective review of all patients between January 2017 and June 2020 at Temple University Hospital who underwent evaluation by the pulmonary embolism response team (PERT) and included all cases of acute PE diagnosed by computed tomography pulmonary angiography (CTPA). Cases of acute PE diagnosed by other imaging modalities were



1  
2  
3 excluded from the study. Cases of pulmonary infarction were identified by review of the final CT  
4 reports by board-certified thoracic radiologists. Our study met approval by the Institutional  
5 Review Board (Protocol #26021) and informed consent was waived due to the retrospective  
6 nature of the study. Figure 1 demonstrates patient selection.  
7  
8  
9  
10

## 11 Data Collection

### 12 Clinical data

13 Patient demographic, clinical features, laboratory data, echocardiographic data, radiographic  
14 characteristics, and patient outcomes were extracted from electronic medical records.  
15

16 Demographics included age, gender, race, and body mass index (BMI). Clinical features  
17 included symptoms at presentation, comorbid conditions, calculated simplified pulmonary  
18 embolism severity index (sPESI), and PE severity per the European Society of Cardiology (ESC)  
19 guideline at the time of diagnosis (i.e., low, intermediate-low, intermediate-high, and high  
20 risk).<sup>(10)</sup> Laboratory data included B-type natriuretic peptide (BNP; positive if  $\geq 100$ pg/ml) and  
21 troponin I (positive if  $\geq 0.1$ ng/ml). Data regarding treatment modalities, length of stay, in-  
22 hospital mortality, readmission within 30 days, new oxygen on discharge, complications  
23 including major and minor bleeding using the International Society on Thrombosis and  
24 Haemostasis (ISTH) criteria<sup>(11)</sup>, need for transfusion, access site hematoma, and pulmonary  
25 follow-up were recorded.  
26  
27  
28  
29  
30  
31  
32  
33  
34  
35  
36  
37  
38  
39  
40  
41  
42  
43

### 44 Radiographic data

45 All CTPAs performed at the time of acute PE diagnosis were retrieved. A central PE was defined  
46 as the presence of thrombus in the main trunk of pulmonary artery (PA) or the left or the right  
47 main PA. A peripheral PE was defined as thrombus in the lobar, segmental, or subsegmental PA.  
48  
49  
50  
51  
52  
53  
54 Signs of right ventricular (RV) strain were defined as the presence of one, or a combination of  
55  
56  
57  
58  
59  
60

1  
2  
3 the following signs: 1) right-to-left ventricular ratio  $>0.9$ ; 2) pulmonary artery enlargement; 3)  
4 abnormal interventricular septum (flattening of septum or leftward septal bowing); and 4)  
5 inferior vena caval contrast reflux. Parameters including PE distribution (central vs distal),  
6 infarct location and burden, signs of RV strain, and other parenchymal abnormalities were  
7 collected. All available follow-up CT chest imaging up to 1-year post-discharge were reviewed  
8 by board-certified thoracic radiologists to determine the resolution of infarctions or residual  
9 abnormalities on available scans. All echocardiograms were reviewed, and data regarding left  
10 ventricular ejection fraction (LVEF), RV dilation, and RV dysfunction were collected.

## 11 12 13 14 15 16 17 18 19 20 21 Statistical analysis

22 All continuous variables were tested for normality and presented as mean with a standard  
23 deviation (SD), or median with an interquartile range (IQR) if distribution was skewed.

24 Categorical variables were presented as absolute number (percentage). Comparisons between  
25 patients with and without infarction were performed using Student t-test or Mann-Whitney U for  
26 continuous variables, or Fischer's exact or  $X^2$  test for categorical variables, as appropriate.

27 Univariable and multivariable logistic regression models were used to evaluate risk factors  
28 associated with pulmonary infarction. The software SPSS Statistics for Mac, version 26.0 (IBM  
29 Corp., Armonk, NY, USA) was used for statistical analysis. P-values of  $<0.05$  (two-sided) were  
30 considered statistically significant.

## 31 32 33 34 35 36 37 38 39 40 41 42 43 44 **Results**

### 45 Patient characteristics

46 Twenty-nine percent (143 of 496) of patients had evidence of pulmonary infarction on CTPA.  
47 Patients with pulmonary infarction were younger ( $52 \pm 15.9$  vs.  $61 \pm 16.6$  years,  $p<0.001$ ) and  
48 with a significantly lower prevalence of comorbidities including cardiac disease (30% vs 42%,  
49  
50  
51  
52  
53  
54  
55  
56  
57  
58  
59  
60

p=0.014), chronic kidney disease (CKD) (5% vs 42%, p=0.018), diabetes mellitus (17% vs 26%, p=0.032), hypothyroidism (4% vs 9%, p=0.039) and malignancy (16% vs 25%, p= 0.032).

Although results did not reach statistical significance, chronic obstructive pulmonary disease (COPD) was less prevalent in the infarction group. Patients with infarction were more likely to present with pleuritic chest pain (32% vs 20%, p=0.004) and hemoptysis (8% vs 3%, p= 0.04), while patients without infarction were more likely to present with syncope (6% vs 11%, p=0.05). The baseline characteristics and symptoms of presentation of the study population are reported in

Table 1.

Table 1. Baseline characteristics and symptoms of presentation.

|                                 | All (496)      | Without infarction (353) | With infarction (143) | P-value |
|---------------------------------|----------------|--------------------------|-----------------------|---------|
| Gender (female)                 | 238 (48%)      | 168 (48%)                | 70 (49%)              | 0.784   |
| Age, mean ( $\pm$ SD)           | 58 $\pm$ 16.9  | 61 $\pm$ 16.6            | 52 $\pm$ 15.9         | <0.001  |
| Race, n (%)                     |                |                          |                       | 0.017   |
| Black                           | 249 (50%)      | 168 (48%)                | 81 (57%)              |         |
| White                           | 98 (20%)       | 81 (23%)                 | 17 (12%)              |         |
| Other                           | 149 (30%)      | 104 (30%)                | 45 (32%)              |         |
| BMI, mean ( $\pm$ SD)           | 31.8 $\pm$ 9.3 | 31.8 $\pm$ 9.5           | 32.0 $\pm$ 8.7        | 0.421   |
| Symptoms at presentation, n (%) |                |                          |                       |         |
| Dyspnea                         | 297 (60%)      | 207 (59%)                | 90 (63%)              | 0.376   |
| Hypoxia                         | 237 (49%)      | 173 (50%)                | 64 (46%)              | 0.371   |
| Pleuritic chest pain            | 114 (23%)      | 69 (20%)                 | 45 (32%)              | 0.004   |
| DVT symptoms                    | 50 (10%)       | 40 (11%)                 | 10 (7%)               | 0.146   |
| Syncope                         | 48 (10%)       | 40 (11%)                 | 8 (6%)                | 0.05    |
| Hemoptysis                      | 21 (4%)        | 9 (3%)                   | 12 (8%)               | 0.04    |
| Altered mental status           | 38 (8%)        | 28 (8%)                  | 10 (7%)               | 0.722   |
| Cardiac arrest                  | 22 (4%)        | 15 (4%)                  | 7 (5%)                | 0.752   |
| Comorbidities, n (%)            |                |                          |                       |         |
| Cardiac diseases                | 191 (39%)      | 148 (42%)                | 43 (30%)              | 0.014   |
| COPD/asthma                     | 71 (14%)       | 54 (15%)                 | 17 (12%)              | 0.326   |
| CKD                             | 49 (10%)       | 42 (12%)                 | 7 (5%)                | 0.018   |
| Diabetes mellitus               | 115 (23%)      | 91 (26%)                 | 24 (17%)              | 0.032   |
| Hypothyroidism                  | 36 (7%)        | 31 (9%)                  | 5 (4%)                | 0.039   |
| Malignancy                      | 111 (22%)      | 88 (25%)                 | 23 (16%)              | 0.032   |
| Recent surgery                  | 68 (14%)       | 52 (15%)                 | 16 (11%)              | 0.299   |
| Current anticoagulation         | 59 (12%)       | 41 (12%)                 | 18 (13%)              | 0.762   |

COPD= chronic obstructive pulmonary disease; CKD= chronic kidney disease; BMI= body mass index; DVT= deep vein thrombosis; SD= standard deviation.

### Risk stratification of PE

Troponin elevation (>0.1ng/ml) was less frequently observed in patients with infarction (39% vs 49%, p= 0.031). The presence of RV strain on CT was significantly higher in patients with infarction (58% vs 45%, p=0.009), although no differences in signs of RV dilation or dysfunction on echocardiogram between infarction and non-infarction group were noted. There was no significant difference in sPESI score, BNP elevation, PE severity, or evidence of RV dysfunction on electrocardiography and echocardiogram between groups. Table 2 describes factors associated with PE severity.

Table 2. PE severity indices.

|                              | All (496) | Without infarction (353) | With infarction (143) | P-value      |
|------------------------------|-----------|--------------------------|-----------------------|--------------|
| sPESI score, mean            | 1.43      | 1.46                     | 1.36                  | 0.339        |
| Elevated BNP                 | 242 (54%) | 169 (53%)                | 73 (55%)              | 0.629        |
| Elevated troponin            | 228 (46%) | 173 (49%)                | 55 (39%)              | <b>0.031</b> |
| Evidence of RV strain on EKG | 77 (16%)  | 48 (14%)                 | 29 (21%)              | 0.137        |
| PE severity                  |           |                          |                       |              |
| Low risk                     | 132 (27%) | 93 (26%)                 | 39 (27%)              | 0.994        |
| Intermediate low risk        | 173 (35%) | 124 (35%)                | 49 (34%)              |              |
| Intermediate high risk       | 144 (29%) | 103 (29%)                | 41 (29%)              |              |
| High risk                    | 47 (10%)  | 33 (9%)                  | 14 (10%)              |              |
| Elevated BNP                 | 242 (54%) | 169 (53%)                | 73 (55%)              | 0.629        |
| Elevated troponin            | 228 (46%) | 173 (49%)                | 55 (39%)              | <b>0.031</b> |
| EKG evidence of RV strain    | 77 (16%)  | 48 (14%)                 | 29 (21%)              | 0.137        |
| CT evidence of RV strain     | 242 (49%) | 159 (45%)                | 83 (58%)              | <b>0.009</b> |
| Echocardiogram               |           |                          |                       |              |
| RV dilation                  | 251 (54%) | 173 (52%)                | 78 (57%)              | 0.302        |
| RV dysfunction               | 235 (50%) | 162 (49%)                | 73 (54%)              | 0.338        |
| LVEF                         | 38 (8%)   | 23 (7%)                  | 15 (11%)              | 0.306        |
| LE DVT                       | 227 (50%) | 161 (51%)                | 66 (50%)              | 0.928        |
| UE DVT                       | 39 (22%)  | 27 (22%)                 | 12 (21%)              | 0.916        |

BNP= B-type natriuretic peptide; CT= computed tomography; DVT= deep vein thrombosis; EKG= electrocardiography; LE= lower extremity; LVEF= left ventricular ejection fraction; sPESI= simplified pulmonary embolism severity index; RV= right ventricular; LVEF= left ventricular ejection fraction; PE= pulmonary embolism; UE= upper extremity

### Radiographic characteristics

There was no difference in PE distribution and clot burden between groups and 50% of patients with infarction had thrombus located at the main PAs including those who had saddle PE. Most infarction occurred in lower lobe (60%) and involved single lobe (64%). Patients with infarction were more likely to have parenchymal abnormalities including consolidation (21% vs 12%,  $p=0.007$ ), pulmonary edema (13% vs 7%,  $p=0.036$ ), pleural effusion (33% vs 24%,  $p=0.038$ ) and ground glass opacity (20% vs 13%,  $p=0.042$ ). Table 3a demonstrates the radiographic characteristics of patients with acute PE. Table 3b demonstrates the radiographic characteristics of pulmonary infarction. Fifty-eight (41%) patients had follow-up CT-chest imaging for variety of reasons performed up to 1-year post-discharge, resolution of pulmonary infarction was observed in 53% (17 out of 32), 85% (12 out of 14), and 92% (11 out of 12) of patients who had imaging at 3-month, 6-month and 1-year interval.

Table 3a. Radiographic characteristics of patients with acute pulmonary embolism.

|                          | All (496) | Without infarction (353) | With infarction (143) | P-value      |
|--------------------------|-----------|--------------------------|-----------------------|--------------|
| RV strain on CT          | 242 (49%) | 159 (45%)                | 83 (58%)              | <b>0.009</b> |
| RV to LV ratio $\geq 1$  | 155 (31%) | 106 (30%)                | 49 (34%)              | 0.640        |
| Dilated PA               | 99 (20%)  | 59 (17%)                 | 40 (28%)              | <b>0.011</b> |
| Septal position          |           |                          |                       | <b>0.030</b> |
| Rightward bowing         | 131 (27%) | 102 (29%)                | 29 (20%)              |              |
| Flattened                | 112 (23%) | 66 (19%)                 | 46 (32%)              |              |
| Leftward bowing          | 50 (10%)  | 32 (9%)                  | 18 (13%)              |              |
| PE distribution          |           |                          |                       | 0.052        |
| Central PE               | 216 (44%) | 144 (41%)                | 72 (50%)              |              |
| Distal PE                | 280 (57%) | 209 (59%)                | 71 (50%)              |              |
| Clot burden              |           |                          |                       | 0.200        |
| Main, saddle or proximal | 215 (43%) | 143 (41%)                | 72 (50%)              |              |
| Interlobar to lobar      | 124 (25%) | 94 (27%)                 | 30 (21%)              |              |
| Segmental                | 150 (30%) | 110 (31%)                | 40 (28%)              |              |
| Subsegmental             | 7 (1%)    | 6 (2%)                   | 1 (1%)                |              |

|                           |           |           |          |       |
|---------------------------|-----------|-----------|----------|-------|
| Parenchymal abnormalities |           |           |          |       |
| Pulmonary edema           | 42 (9%)   | 24 (7%)   | 18 (13%) | 0.036 |
| Consolidation             | 71 (14%)  | 41 (12%)  | 30 (21%) | 0.007 |
| Emphysema                 | 65 (13%)  | 48 (14%)  | 16 (11%) | 0.469 |
| Fibrosis                  | 42 (9%)   | 30 (9%)   | 12 (8%)  | 0.969 |
| Pleural effusion          | 128 (26%) | 84 (24%)  | 47 (33%) | 0.038 |
| Atelectasis               | 161 (33%) | 113 (32%) | 48 (34%) | 0.738 |
| Ground glass opacity      | 72 (15%)  | 44 (13%)  | 28 (20%) | 0.042 |

CT= computed tomography; LV= left ventricular; RV= right ventricular; PA= pulmonary artery; PE= pulmonary embolism

Table 3b. Radiographic characteristics of pulmonary infarction.

|                  | Infarcts, number (%) |
|------------------|----------------------|
| Infarct location |                      |
| Upper lobe       | 31 (22%)             |
| Middle lobe      | 8 (6%)               |
| Lower lobe       | 86 (60%)             |
| Multiple         | 18 (12%)             |
| Infarct burden   |                      |
| Single lobe      | 91 (64%)             |
| Multiple lobes   | 52 (36%)             |

### Treatment and outcomes

There was no significant difference in the number of patients receiving advanced reperfusion therapy between groups. Most patients with pulmonary infarction received anticoagulation alone (69%), followed by catheter-directed thrombolysis (12%), and systemic thrombolysis (11%).

There were more patients with infarction who received antimicrobial therapy compared to those without infarction (15% vs 5%,  $p < 0.001$ ). Among the 47 patients who had concomitant infarction and pleural effusion, six patients (13%) underwent diagnostic and/or therapeutic thoracentesis and five had an exudative pleural effusion. Patients with infarction were less likely to require oxygen on discharge (11% vs 19%,  $p = 0.031$ ), and those who required oxygen on discharge were more likely to have multiple lobe infarctions than single lobe infarction (19% vs 7%,  $p = 0.032$ ). There was no significant difference between patients with infarction and without infarction regarding length of stay ( $10.7 \pm 14.7$  vs  $9.5 \pm 12.3$ ,  $p = 0.698$ ), in-hospital death

(7% vs 8%,  $p=0.801$ ), disposition (home: 78% vs 75%,  $p=0.759$ ), bleeding complications (24% vs 12%,  $p=0.089$ ) and readmission within 30 days (18% vs 16%,  $p=0.584$ ) (Supplemental material online, table 1).

Patients with infarction who underwent CDT had a longer length of stay ( $15 \pm 24.4$  vs  $7 \pm 8.4$ ,  $p=0.044$ ) and a higher rate of readmission within 30 days (18% vs 2%,  $p=0.047$ ), compared to those without infarction. Readmission diagnoses of patients with infarction who underwent CDT were as follows: one patient developed vaginal bleeding from anticoagulant use, one patient developed acute hypoxic respiratory failure due to multifocal pneumonia, and one patient was admitted for chest pain. There was no significant difference in in-hospital mortality (6% vs 6%,  $p=0.973$ ) and complications including minor and major bleeding (24% vs 21%,  $p=0.676$ ), access site hematoma (13% vs 2%,  $p=0.134$ ) and need for transfusion (18% vs 13%,  $p=0.649$ ) between those with and without infarction (Supplemental material online, table 2).

In univariable regression analyses, we identified several factors independently associated with pulmonary infarction. These included age, history of cardiac diseases, malignancy, hypothyroidism, diabetes mellitus, CKD, elevated troponin, pleuritic chest pain, hemoptysis, and RV strain on CT. A multivariable regression analysis was subsequently performed, and four factors remained significant: Both hemoptysis (OR, 3.034; 95% CI, 1.162-7.924) and presence of RV strain on CT (OR, 2.142; 95% CI 1.365-3.360) significantly increased the risk of infarction, while age (OR, 0.973, 95% CI, 0.959-0.987) and presence of elevated troponin (OR, 0.629; 95% CI 0.398-0.993) decreased risk (Table 4).

Table 4. Univariate and multivariate analysis of potential risk factors.

|                  | Variables                |                       | Univariate analysis |         |             | Multivariate analysis |         |             |
|------------------|--------------------------|-----------------------|---------------------|---------|-------------|-----------------------|---------|-------------|
|                  | Without infarction (353) | With infarction (143) | Odds ratio          | P-value | 95% CI      | Odds ratio            | P-value | 95% CI      |
| Age, years       | $61 \pm 16.6$            | $52 \pm 15.9$         | 0.968               | <0.001  | 0.956-0.980 | 0.973                 | <0.001  | 0.959-0.987 |
| Cardiac diseases | 148 (42%)                | 43 (30%)              | 0.596               | 0.014   | 0.393-0.902 |                       |         |             |
| CKD              | 42 (12%)                 | 7 (5%)                | 0.381               | 0.022   | 0.167-0.870 |                       |         |             |

|                   |           |          |       |       |             |       |        |             |
|-------------------|-----------|----------|-------|-------|-------------|-------|--------|-------------|
| DM                | 91 (26%)  | 24 (17%) | 0.581 | 0.033 | 0.352-0.957 |       |        |             |
| Malignancy        | 88 (25%)  | 23 (16%) | 0.577 | 0.034 | 0.348-0.958 |       |        |             |
| Hypothyroidism    | 31 (9%)   | 5 (4%)   | 0.375 | 0.047 | 0.143-0.985 |       |        |             |
| Elevated troponin | 173 (49%) | 55 (39%) | 0.647 | 0.032 | 0.435-0.962 | 0.629 | 0.047  | 0.398-0.993 |
| Pleuritic CP      | 69 (20%)  | 45 (32%) | 1.890 | 0.005 | 1.217-2.935 |       |        |             |
| Hemoptysis        | 9 (3%)    | 12 (8%)  | 3.491 | 0.006 | 1.437-8.479 | 3.034 | 0.023  | 1.162-7.924 |
| RV strain on CT   | 159 (45%) | 83 (58%) | 1.688 | 0.009 | 1.140-2.500 | 2.142 | <0.001 | 1.365-3.360 |

CP= chest pain; CKD= chronic kidney disease; CT= computed tomography DM= diabetes mellites; RV= right ventricular

## Discussion

In this study, the estimated prevalence of pulmonary infarction was 29%. Patients with infarction were more likely to present with pleuritic chest pain and hemoptysis. Additionally, those with pulmonary infarction were younger and had a lower prevalence of comorbidities. While the presence of RV strain on CT imaging was more common in patients with pulmonary infarction, the rate of reperfusion therapies, complications, and outcomes was similar in both groups. The presence of hemoptysis and RV strain on CT significantly increased the risk of infarction, whereas age and elevated troponin decreased the risk. Pulmonary infarction resolved in the majority of patients for whom follow-up imaging was available, which is in concordance with newer studies (8, 9, 12).

The prevalence of pulmonary infarction in our cohort is in keeping with previously reported rates ranging from 9% to 36% (3, 12). Regarding clinical presentation, the higher presence of pleuritic chest pain and hemoptysis in patients with infarction likely represents a result of alveolar hemorrhage, leading to pleural inflammation, irritation, and necrosis. In addition, the presence of pleural effusion was more prevalent in patients with infarction due to pleural inflammation following infarction, however, most of these effusions were not intervened upon and had resolved on follow-up imaging. Interestingly, patients with pulmonary infarction were more likely to be treated with antimicrobial therapy than those without. One possible explanation is that other lung processes, such as pneumonia, pulmonary edema, or atelectasis can produce



1  
2  
3 consolidative changes similar to infarction on CT imaging (13), and as a result, pneumonia  
4 cannot be excluded especially when combined with a clinically compatible presentation.  
5

6  
7 In our study, patients with infarction were significantly younger and with fewer comorbid  
8 conditions, specifically a lower prevalence of cardiac disease and malignancy that have  
9 traditionally been regarded as major risk factors for infarction. This discrepancy may be due to a  
10 lack of efficient collateral circulation to lung tissues, which presumably develops in the setting of  
11 longstanding local tissue hypoxia (8, 14), and is unlikely to happen in otherwise healthy, young  
12 individuals in absence of cardiopulmonary diseases.  
13  
14

15  
16 Our cohort also found that patients with infarction did have higher rates of RV strain, dilated PA,  
17 and flattened or leftward bowing of interventricular septum, although signs of RV strain were not  
18 reproducible on echocardiography. A potential explanation for this finding is that patients with  
19 infarction were younger with less comorbid diseases, thus without pre-existing RV hypertrophy  
20 allowing for tolerance of acute RV afterload elevation. Regarding the discrepancy between CT  
21 and echocardiographic findings, unlike CTPA which is often the first diagnostic and  
22 confirmatory modality for PE, most echocardiography is performed after the initial diagnosis and  
23 potentially after reperfusion therapy. Thus, it is possible that the initial signs of RV strain shown  
24 on CTPA could have improved or resolved through several potential mechanisms; administration  
25 of supplemental oxygen leading to a reversal of hypoxic vasoconstriction, clot burden reduction  
26 using reperfusion therapy, or intrinsic thrombolytic activity with anticoagulation support alone.  
27  
28 Importantly, we demonstrated no differences in complication rates and in-hospital mortality in  
29 patients who underwent CDT with pulmonary infarction compared to those without, although  
30 patients with infarction had a longer length of stay and a higher rate of 30-day readmission for  
31 non-PE or CDT-related diagnoses. There remains a theoretical risk of increased bleeding  
32  
33  
34  
35  
36  
37  
38  
39  
40  
41  
42  
43  
44  
45  
46  
47  
48  
49  
50  
51  
52  
53  
54  
55  
56  
57  
58  
59  
60

1  
2  
3 complications in the area of pulmonary infarction during catheter manipulation and local  
4 installation of thrombolytics, however, this was not demonstrated in our cohort.  
5  
6

7  
8 To the best of our knowledge, this study represented the largest cohort of patients with acute PE  
9 complicated by pulmonary infarction, however, there are several limitations in our study. Cases  
10 of pulmonary infarction were identified based on CT findings and there was no histological  
11 correlation to differentiate between true necrosis versus alveolar hemorrhage. Owing to the  
12 retrospective nature of this study, not all patients underwent CT imaging post-discharge, thus we  
13 were unable to comment on the precise timing of resolution of pulmonary infarction. We  
14 acknowledge the fact that not all patients in our cohort performed echocardiography, in particular  
15 patients with low-risk PE when echocardiography was not deemed necessary to change  
16 management or patients with high-risk PE who expired prior to completion of echocardiography.  
17  
18 In conclusion, pulmonary infarction was demonstrated on CT in nearly one-third of acute PE,  
19 and patients with infarction were younger, with fewer comorbidities, and more likely to present  
20 with pleuritic chest pain and hemoptysis. Overall, there was no difference in length of stay, in-  
21 hospital death, bleeding complication, and readmission rate between patients with and without  
22 infarction, and patients with infarction were less likely to require oxygen on discharge. The  
23 presence of pulmonary infarction did not correlate with poorer outcomes and should not be  
24 considered a supporting factor nor a contraindication for advanced reperfusion therapy for PE.  
25  
26

27  
28  
29  
30  
31  
32  
33  
34  
35  
36  
37  
38  
39  
40  
41  
42  
43  
44 **Author contributions:** KUL is the primary author, collected and analyzed the data, and is the  
45 guarantor of the article, taking responsibility for the integrity of the work as a whole from  
46 inception to published article. OO and PR are responsible for the study concept and helped write  
47 the manuscript. RB, GC, VL, and JP reviewed the imaging studies and treated the patients who  
48 underwent catheter-directed thrombolysis. SB and BRL helped write the manuscript.  
49  
50  
51  
52  
53  
54  
55  
56  
57  
58  
59  
60

1  
2  
3 **Conflict of interest:** There are no financial or other conflicts of interest to disclose.  
4

5 **Ethics approval:** This study was approved by the Institutional Review Board (Protocol #26021)  
6  
7 at Temple University Hospital and informed consent was waived due to the retrospective nature  
8  
9 of the study.  
10

11  
12 **Patient consent for publication:** Not required.  
13

14 **Funding statement:** This study received no funding.  
15

16  
17 **Data sharing statement:** Data used to produce this manuscript are available on request from the  
18  
19 corresponding author.  
20

21 **Patient and public involvement:** Patients or the public were not involved in the design,  
22  
23 recruitment, conduct, reporting, or dissemination of our research.  
24  
25  
26  
27  
28  
29  
30  
31  
32  
33  
34  
35  
36  
37  
38  
39  
40  
41  
42  
43  
44  
45  
46  
47  
48  
49  
50  
51  
52  
53  
54  
55  
56  
57  
58  
59  
60

## Reference

1. Barco S, Valerio L, Ageno W, Cohen AT, Goldhaber SZ, Hunt BJ, Iorio A, Jimenez D, Klok FA, Kucher N, Mahmoudpour SH, Middeldorp S, Münzel T, Tagalakis V, Wendelboe AM, Konstantinides SV. Age-sex specific pulmonary embolism-related mortality in the USA and Canada, 2000–18: an analysis of the WHO Mortality Database and of the CDC Multiple Cause of Death database. *The Lancet Respiratory Medicine* 2021; 9: 33-42.
2. Raskob GE, Angchaisuksiri P, Blanco AN, Buller H, Gallus A, Hunt BJ, Hylek EM, Kakkar A, Konstantinides SV, McCumber M, Ozaki Y, Wendelboe A, Weitz JI. Thrombosis: a major contributor to global disease burden. *Arterioscler Thromb Vasc Biol* 2014; 34: 2363-2371.
3. Heyer CM, Lemburg SP, Knoop H, Holland-Letz T, Nicolas V, Roggenland D. Multidetector-CT angiography in pulmonary embolism—can image parameters predict clinical outcome? *European Radiology* 2011; 21: 1928-1937.
4. Osiro S, Wear C, Hudson R, Ma XX, Zurada A, Michalak M, Loukas M. A friend to the airways: a review of the emerging clinical importance of the bronchial arterial circulation. *Surg Radiol Anat* 2012; 34: 791-798.
5. Pump KK. The bronchial arteries and their anastomoses in the human lung. *Dis Chest* 1963; 43: 245-255.
6. Hampton AO, Castleman BL. Correlation of postmortem chest teleroentgenograms with autopsy findings with special reference to pulmonary embolism and infarction. 1940.
7. Tsao MS, Schraufnagel D, Wang NS. Pathogenesis of pulmonary infarction. *Am J Med* 1982; 72: 599-606.
8. Islam M, Filopei J, Frank M, Ramesh N, Verzosa S, Ehrlich M, Bondarsky E, Miller A, Steiger D. Pulmonary infarction secondary to pulmonary embolism: An evolving paradigm. *Respirology* 2018.
9. Miniati M, Bottai M, Ciccotosto C, Roberto L, Monti S. Predictors of Pulmonary Infarction. *Medicine (Baltimore)* 2015; 94: e1488.
10. Konstantinides SV, Meyer G, Becattini C, Bueno H, Geersing GJ, Harjola VP, Huisman MV, Humbert M, Jennings CS, Jiménez D, Kucher N, Lang IM, Lankeit M, Lorusso R, Mazzolai L, Meneveau N, F NÁ, Prandoni P, Pruszczyk P, Righini M, Torbicki A, Van Belle E, Zamorano JL. 2019 ESC Guidelines for the diagnosis and management of acute pulmonary embolism developed in collaboration with the European Respiratory Society (ERS). *Eur Heart J* 2020; 41: 543-603.
11. Schulman S, Kearon C. Definition of major bleeding in clinical investigations of antihemostatic medicinal products in non-surgical patients. *J Thromb Haemost* 2005; 3: 692-694.
12. Cha S-I, Shin K-M, Lee J, Hwangbo Y, Yoo S-S, Lee J, Lee S-Y, Kim C-H, Park J-Y, Jung T-H. Clinical relevance of pulmonary infarction in patients with pulmonary embolism. *Thrombosis Research* 2012; 130: e1-e5.
13. Ren H, Kuhlman JE, Hruban RH, Fishman EK, Wheeler PS, Hutchins GM. CT of inflation-fixed lungs: wedge-shaped density and vascular sign in the diagnosis of infarction. *J Comput Assist Tomogr* 1990; 14: 82-86.

1  
2  
3  
4  
5  
6  
7  
8  
9  
10  
11  
12  
13  
14  
15  
16  
17  
18  
19  
20  
21  
22  
23  
24  
25  
26  
27  
28  
29  
30  
31  
32  
33  
34  
35  
36  
37  
38  
39  
40  
41  
42  
43  
44  
45  
46  
47  
48  
49  
50  
51  
52  
53  
54  
55  
56  
57  
58  
59  
60

14. Malik AB, Tracy SE. Bronchovascular adjustments after pulmonary embolism. *Journal of Applied Physiology* 1980; 49: 476-481.

For peer review only

1  
2  
3 Figure 1. Patient selection flow diagram.  
4  
5  
6  
7  
8  
9  
10  
11  
12  
13  
14  
15  
16  
17  
18  
19  
20  
21  
22  
23  
24  
25  
26  
27  
28  
29  
30  
31  
32  
33  
34  
35  
36  
37  
38  
39  
40  
41  
42  
43  
44  
45  
46  
47  
48  
49  
50  
51  
52  
53  
54  
55  
56  
57  
58  
59  
60

1  
2  
3  
4  
5  
6  
7  
8  
9  
10  
11  
12  
13  
14  
15  
16  
17  
18  
19  
20  
21  
22  
23  
24  
25  
26  
27  
28  
29  
30  
31  
32  
33  
34  
35  
36  
37  
38  
39  
40  
41  
42  
43  
44  
45  
46  
47  
48  
49  
50  
51  
52  
53  
54  
55  
56  
57  
58  
59  
60

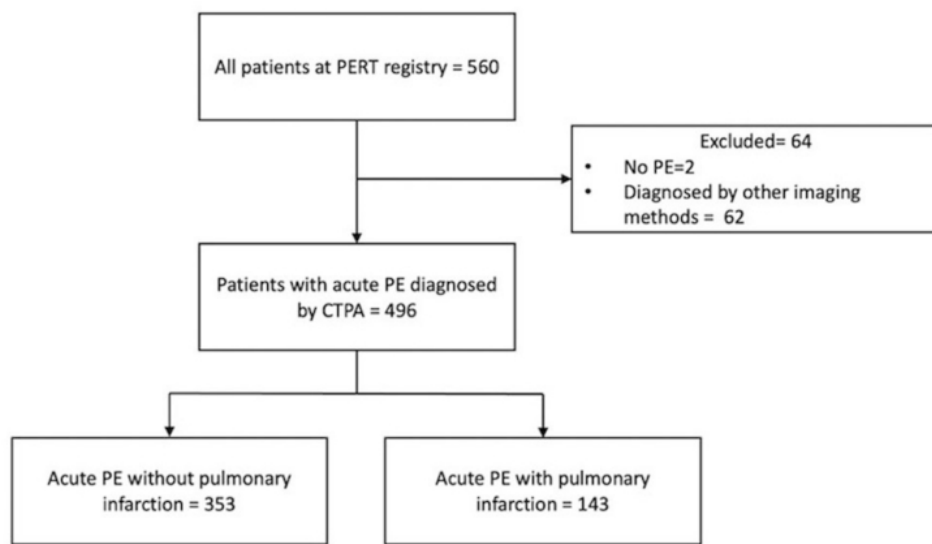

Figure 1. Patient selection flow diagram.

32x19mm (600 x 600 DPI)

Supplemental material, table 1. Treatment and outcomes between patients with and without infarction.

|                            | All (496)  | Without infarction (353) | With infarction (143) | P-value |
|----------------------------|------------|--------------------------|-----------------------|---------|
| Anticoagulation alone      | 357 (72%)  | 259 (73%)                | 98 (69%)              | 0.545   |
| CDT                        | 70 (14%)   | 53 (15%)                 | 17 (12%)              | 0.365   |
| Thrombolysis               |            |                          |                       | 0.212   |
| Half dose                  | 25 (5%)    | 15 (4%)                  | 10 (7%)               |         |
| Full dose                  | 14 (3%)    | 8 (2%)                   | 6 (4%)                |         |
| Mechanical thrombectomy    | 19 (4%)    | 10 (3%)                  | 9 (6%)                | 0.069   |
| Surgical thrombectomy      | 9 (2%)     | 6 (2%)                   | 3 (2%)                | 0.763   |
| ECMO                       | 11 (2%)    | 6 (2%)                   | 5 (4%)                | 0.218   |
| Mechanical ventilation     | 48 (10%)   | 30 (9%)                  | 18 (13%)              | 0.163   |
| Antimicrobials             | 39 (8%)    | 19 (5%)                  | 22 (15%)              | <0.001  |
| In-hospital death          | 37 (8%)    | 27 (8%)                  | 10 (7%)               | 0.801   |
| Disposition                |            |                          |                       | 0.759   |
| Home                       | 349 (76%)  | 245 (75%)                | 104 (78%)             |         |
| ECF                        | 100 (22%)  | 74 (23%)                 | 26 (20%)              |         |
| Hospice                    | 10 (2%)    | 7 (2%)                   | 3 (2%)                |         |
| Length of stay, days       | 10±13.0    | 9.5±12.3                 | 10.7±14.7             | 0.698   |
| Bleeding complication      |            |                          |                       | 0.089   |
| Minor bleeding             | 31 (6%)    | 25 (7%)                  | 6 (4%)                |         |
| Major bleeding             | 32 (7%)    | 18 (5%)                  | 14 (10%)              |         |
| Need for transfusion       | 63 (13%)   | 41 (12%)                 | 22 (16%)              | 0.253   |
| Readmission within 30 days | 76 (16.6%) | 52 (16%)                 | 24 (18%)              | 0.584   |
| New O2 on discharge        | 75 (16%)   | 61 (19%)                 | 14 (11%)              | 0.031   |
| Pulmonary follow-up        | 199 (42%)  | 144 (44%)                | 55 (40%)              | 0.610   |

CDT= catheter-directed thrombolysis; ECMO= extracorporeal membrane oxygenation;  
ECF= extended care facility



Supplemental material, table 2. Outcomes and complication rates in CDT.

|                            | All (70) | Without infarction (53) | With infarction (17) | P-value |
|----------------------------|----------|-------------------------|----------------------|---------|
| In-hospital death          | 4 (6%)   | 3 (6%)                  | 1 (6%)               | 0.973   |
| Disposition                |          |                         |                      | 0.436   |
| Home                       | 57 (86%) | 42 (84%)                | 15 (94%)             |         |
| ECF                        | 9 (14%)  | 8 (16%)                 | 1 (7%)               |         |
| Length of Stay             | 9±14.2   | 7±8.4                   | 15±24.4              | 0.044   |
| Readmission within 30 days | 4 (6%)   | 1 (2%)                  | 3 (18%)              | 0.047   |
| New O2 on discharge        | 10 (16%) | 8 (17%)                 | 2 (12%)              | 0.609   |
| Pulmonary follow-up        | 47 (72%) | 38 (76%)                | 9 (56%)              | 0.166   |
| <b>Complications</b>       |          |                         |                      |         |
| Bleeding                   |          |                         |                      | 0.676   |
| Minor                      | 10 (14%) | 8 (15%)                 | 2 (12%)              |         |
| Major                      | 5 (7%)   | 3 (6%)                  | 2 (12%)              |         |
| RBC transfusion            | 10 (14%) | 7 (13%)                 | 3 (18%)              | 0.649   |
| Access site hematoma       | 3 (5%)   | 1 (2%)                  | 2 (13%)              | 0.134   |

ECF= extended care facility; RBC= red blood cell

1  
2  
3  
4  
5  
6  
7  
8  
9  
10  
11  
12  
13  
14  
15  
16  
17  
18  
19  
20  
21  
22  
23  
24  
25  
26  
27  
28  
29  
30  
31  
32  
33  
34  
35  
36  
37  
38  
39  
40  
41  
42  
43  
44  
45  
46  
47  
48  
49  
50  
51  
52  
53  
54  
55  
56  
57  
58  
59  
60

For peer review only

# BMJ Open

## Clinical Outcomes and Factors Associated with Pulmonary Infarction Following Acute Pulmonary Embolism: A Retrospective Observational Study at a US Academic Center

|                                 |                                                                                                                                                                                                                                                                                                                                                                                                                                                                                                                                                                                                                                                                                                                                                                                                                                                  |
|---------------------------------|--------------------------------------------------------------------------------------------------------------------------------------------------------------------------------------------------------------------------------------------------------------------------------------------------------------------------------------------------------------------------------------------------------------------------------------------------------------------------------------------------------------------------------------------------------------------------------------------------------------------------------------------------------------------------------------------------------------------------------------------------------------------------------------------------------------------------------------------------|
| Journal:                        | <i>BMJ Open</i>                                                                                                                                                                                                                                                                                                                                                                                                                                                                                                                                                                                                                                                                                                                                                                                                                                  |
| Manuscript ID                   | bmjopen-2022-067579.R1                                                                                                                                                                                                                                                                                                                                                                                                                                                                                                                                                                                                                                                                                                                                                                                                                           |
| Article Type:                   | Original research                                                                                                                                                                                                                                                                                                                                                                                                                                                                                                                                                                                                                                                                                                                                                                                                                                |
| Date Submitted by the Author:   | 15-Nov-2022                                                                                                                                                                                                                                                                                                                                                                                                                                                                                                                                                                                                                                                                                                                                                                                                                                      |
| Complete List of Authors:       | Lio, Ka U; Lewis Katz School of Medicine at Temple University, Department of Medicine<br>O'Corragain, Oisin; Lewis Katz School of Medicine at Temple University, Department of Thoracic Medicine and Surgery<br>Bashir, Riyaz ; Lewis Katz School of Medicine at Temple University, Cardiology<br>Brosnahan, Shari; NYU Langone Health, Pulmonary, Critical Care and Sleep Medicine<br>Cohen, Gary; Lewis Katz School of Medicine at Temple University, Radiology<br>Lakhter, Vladimir; Lewis Katz School of Medicine at Temple University, Cardiology<br>Panaro, Joseph; Lewis Katz School of Medicine at Temple University, Radiology<br>Rivera-Lebron, B; University of Pittsburgh School of Medicine, Pulmonary and Critical Care Medicine<br>Rali, Parth; Lewis Katz School of Medicine at Temple University, Thoracic Medicine and Surgery |
| <b>Primary Subject Heading</b>: | Respiratory medicine                                                                                                                                                                                                                                                                                                                                                                                                                                                                                                                                                                                                                                                                                                                                                                                                                             |
| Secondary Subject Heading:      | Cardiovascular medicine, General practice / Family practice, Intensive care, Radiology and imaging                                                                                                                                                                                                                                                                                                                                                                                                                                                                                                                                                                                                                                                                                                                                               |
| Keywords:                       | Thromboembolism < CARDIOLOGY, RESPIRATORY MEDICINE (see Thoracic Medicine), Thoracic medicine < INTERNAL MEDICINE                                                                                                                                                                                                                                                                                                                                                                                                                                                                                                                                                                                                                                                                                                                                |
|                                 |                                                                                                                                                                                                                                                                                                                                                                                                                                                                                                                                                                                                                                                                                                                                                                                                                                                  |

SCHOLARONE™  
Manuscripts



I, the Submitting Author has the right to grant and does grant on behalf of all authors of the Work (as defined in the below author licence), an exclusive licence and/or a non-exclusive licence for contributions from authors who are: i) UK Crown employees; ii) where BMJ has agreed a CC-BY licence shall apply, and/or iii) in accordance with the terms applicable for US Federal Government officers or employees acting as part of their official duties; on a worldwide, perpetual, irrevocable, royalty-free basis to BMJ Publishing Group Ltd ("BMJ") its licensees and where the relevant Journal is co-owned by BMJ to the co-owners of the Journal, to publish the Work in this journal and any other BMJ products and to exploit all rights, as set out in our [licence](#).

The Submitting Author accepts and understands that any supply made under these terms is made by BMJ to the Submitting Author unless you are acting as an employee on behalf of your employer or a postgraduate student of an affiliated institution which is paying any applicable article publishing charge ("APC") for Open Access articles. Where the Submitting Author wishes to make the Work available on an Open Access basis (and intends to pay the relevant APC), the terms of reuse of such Open Access shall be governed by a Creative Commons licence – details of these licences and which [Creative Commons](#) licence will apply to this Work are set out in our licence referred to above.

Other than as permitted in any relevant BMJ Author's Self Archiving Policies, I confirm this Work has not been accepted for publication elsewhere, is not being considered for publication elsewhere and does not duplicate material already published. I confirm all authors consent to publication of this Work and authorise the granting of this licence.

1  
2  
3 **Clinical Outcomes and Factors Associated with Pulmonary Infarction Following Acute**  
4 **Pulmonary Embolism: A Retrospective Observational Study at a US Academic Center**  
5

6  
7 Ka U Lio<sup>1</sup>, Oisin O'Corragain<sup>2</sup>, Riyaz Bashir<sup>3</sup>, Shari Brosnahan<sup>4</sup>, Gary Cohen<sup>5</sup>, Vladimir  
8  
9 Lakhter<sup>3</sup>, Joseph Panaro<sup>5</sup>, Belinda Rivera-Lebron<sup>6</sup>, Parth Rali<sup>2</sup>

- 10  
11  
12 1 Department of Medicine, Lewis Katz School of Medicine at Temple University,  
13  
14 Philadelphia, PA, United States  
15  
16  
17 2 Department of Thoracic Medicine and Surgery, Lewis Katz School of Medicine at Temple  
18  
19 University, Philadelphia, PA, United States  
20  
21  
22 3 Division of Cardiovascular Diseases, Lewis Katz School of Medicine at Temple University,  
23  
24 Philadelphia, PA, United States  
25  
26  
27 4 Division of Pulmonary, Critical Care and Sleep Medicine, New York University School of  
28  
29 Medicine, New York, NY, United States  
30  
31  
32 5 Department of Radiology, Lewis Katz School of Medicine at Temple University,  
33  
34 Philadelphia, PA, United States  
35  
36  
37 6 Division of Pulmonary and Critical Care Medicine, University of Pittsburgh Medical Center,  
38  
39 Pittsburgh, PA, United States

40 **Corresponding author:**

41  
42 Ka U Lio, MD

43  
44 Department of Medicine, Lewis Katz School of Medicine at Temple University

45  
46 3401 N Broad Street, Philadelphia, PA 19140

47  
48 Phone: +1-267-541-9536

49  
50 Fax number: +1-267-460-3850

51  
52 Email: [kau.lio@tuhs.temple.edu](mailto:kau.lio@tuhs.temple.edu)  
53  
54  
55  
56  
57  
58  
59  
60

1  
2  
3 **Word count:** 2643 words  
4

5 **Keywords:** pulmonary embolism, pulmonary infarction, venous thromboembolism, shortness of  
6  
7 breath, pleuritic chest pain  
8  
9

10 **Abbreviations:** BNP= B-type natriuretic peptide; CDT= catheter-directed thrombolysis; CKD=  
11  
12 chronic kidney disease; CT= computed tomography; CTPA= computed tomography pulmonary  
13  
14 angiography; PA= pulmonary artery; PE= Pulmonary embolism; RV= Right ventricular; sPESI=  
15  
16 simplified pulmonary embolism severity index  
17  
18  
19  
20  
21  
22  
23  
24  
25  
26  
27  
28  
29  
30  
31  
32  
33  
34  
35  
36  
37  
38  
39  
40  
41  
42  
43  
44  
45  
46  
47  
48  
49  
50  
51  
52  
53  
54  
55  
56  
57  
58  
59  
60

## Abstract

**Objective:** Pulmonary infarction is a common clinical and radiographic finding in acute pulmonary embolism (PE), yet the clinical relevance and prognostic significance of pulmonary infarction remain unclear. The study aims to investigate the clinical features, radiographic characteristics, impact of reperfusion therapy, and outcomes of patients with pulmonary infarction.

**Design, setting and participants:** A retrospective cohort study of 496 adult patients ( $\geq 18$  years of age) diagnosed with PE who were evaluated by the pulmonary embolism response team (PERT) at a tertiary academic referral center in the US. We collected baseline characteristics, laboratory, radiographic, and outcome data. Statistical analysis was performed by Student t-test, Mann-Whitney U test, Fischer's exact or  $X^2$  test where appropriate. Multivariate logistic regression was used to evaluate potential risk factors for pulmonary infarction.

**Results:** We identified 143 (29%) cases of pulmonary infarction in 496 patients with PE. Patients with infarction were significantly younger ( $52 \pm 15.9$  vs.  $61 \pm 16.6$  years,  $p < 0.001$ ) and with fewer comorbidities. Most infarctions occurred in the lower lobes (60%) and involved a single lobe (64%). The presence of right ventricular (RV) strain on computed tomography (CT) imaging was significantly more common in patients with infarction (21% vs 14%,  $p = 0.031$ ). There was no significant difference in advanced reperfusion therapy, in-hospital mortality, length of stay, and readmissions between groups. In multivariate analysis, age, and evidence of RV strain on CT and hemoptysis increased the risk of infarction.

**Conclusions:** Radiographic evidence of pulmonary infarction was demonstrated in nearly one-third of patients with acute PE. There was no difference in the rate of reperfusion therapies and the presence of infarction did not correlate with poorer outcomes.

**Strengths and limitations of this study:**

- This study represents the largest cohort describing the clinical characteristics and outcomes of patients with pulmonary infarction.
- This study highlights the potential role of pulmonary infarction in the risk stratification of acute PE.
- Cases of pulmonary infarction were identified based on CT findings and there was no histological correlation to differentiate between true necrosis (infarction) versus alveolar hemorrhage.
- Not all patients underwent CT imaging post-discharge and thus unable to comment on the precise timing of the resolution of infarction and its long-term significance.



## Introduction

Acute pulmonary embolism (PE) is the third leading cause of cardiovascular death following myocardial infarction and stroke, with approximately 100,000 annual deaths in the United States (1, 2). Pulmonary infarction is a common complication of acute PE with a reported radiographic prevalence of up to 36% (3). The dual blood supply of lungs has been thought to be protective against ischemic insults, with the bronchial circulation and other collateral vessels undergoing hypertrophy or remodeling to maintain blood flow to ischemic lung tissues through anastomoses at the level of alveoli and respiratory bronchioles (4, 5). Nevertheless, obstruction of the pulmonary artery by acute PE can cause infarction. In the past, the presence of infarction has been regarded as a sign of poor outcomes due to its association with compromised cardiac function, which leads to increased pulmonary venous pressure and impairment of forwarding flow through the bronchial circulation (6, 7). Contrarily, recent studies have suggested that younger, healthier patients are at the highest risk for infarction, because of their less robust collateral blood supply (8, 9). The clinical relevance and prognostic significance of pulmonary infarction remain unclear. The aim of this study is to investigate the clinical features, radiographic characteristics, impact of reperfusion therapy, and outcomes of patients with pulmonary infarction.

## Methods

### Study population

We conducted a single-center retrospective review of all patients between January 2017 and June 2020 at Temple University Hospital who underwent evaluation by the pulmonary embolism response team (PERT) and included all cases of acute PE diagnosed by computed tomography pulmonary angiography (CTPA). Cases of acute PE diagnosed by other imaging modalities were

1  
2  
3 excluded from the study. Cases of pulmonary infarction were identified by review of the final CT  
4 reports by board-certified thoracic radiologists. Our study met approval by the Institutional  
5 Review Board (Protocol #26021) and informed consent was waived due to the retrospective  
6 nature of the study.  
7  
8  
9  
10

### 11 Patient and public involvement

12 Patients or the public were not involved in the design, recruitment, conduct, reporting, or  
13 dissemination of our research.  
14

### 15 Data Collection

#### 16 Clinical data

17 Patient demographic, clinical features, laboratory data, echocardiographic data, radiographic  
18 characteristics, and patient outcomes were extracted from electronic medical records.  
19 Demographics included age, gender, race, and body mass index (BMI). Clinical features  
20 included symptoms at presentation, comorbid conditions, calculated simplified pulmonary  
21 embolism severity index (sPESI), and PE severity per the European Society of Cardiology (ESC)  
22 guideline at the time of diagnosis (i.e., low, intermediate-low, intermediate-high, and high  
23 risk).<sup>(10)</sup> Laboratory data included B-type natriuretic peptide (BNP; positive if  $\geq 100$ pg/ml) and  
24 troponin I (positive if  $\geq 0.1$ ng/ml). Data regarding treatment modalities, length of stay, in-  
25 hospital mortality, readmission within 30 days, new oxygen requirement on discharge,  
26 complications including major and minor bleeding using the International Society on  
27 Thrombosis and Haemostasis (ISTH) criteria<sup>(11)</sup>, need for transfusion, access site hematoma,  
28 and pulmonary follow-up were recorded.  
29  
30  
31  
32  
33  
34  
35  
36  
37  
38  
39  
40  
41  
42  
43  
44  
45  
46  
47  
48  
49  
50

#### 51 Radiographic data

1  
2  
3 All CTPAs performed at the time of acute PE diagnosis were retrieved. The diagnosis of  
4 infarction was based on a generally accepted criteria with the presence of a peripheral wedge-  
5 consolidation within the region of an obstructed vessel, with or without the presence of the other  
6 suggestive findings including: (i) central lucency; (ii) vessel signs; (iii) air bronchogram (12). In  
7 case of discrepancies, a final decision was reached by consensus. A central PE was defined as the  
8 presence of thrombus in the main trunk of the pulmonary artery (PA) or the left or the right main  
9 PA. A peripheral PE was defined as thrombus in the lobar, segmental, or subsegmental PA.  
10 Signs of right ventricular (RV) strain were defined as the presence of one, or a combination of  
11 the following signs: 1) right-to-left ventricular ratio  $>0.9$ ; 2) pulmonary artery enlargement; 3)  
12 abnormal interventricular septum (flattening of septum or leftward septal bowing); and 4)  
13 inferior vena caval contrast reflux. Parameters including PE distribution (central vs distal),  
14 infarct location and burden, signs of RV strain, and other parenchymal abnormalities were  
15 collected. All available follow-up CT chest imaging up to 1-year post-discharge were reviewed  
16 by board-certified thoracic radiologists to determine the resolution of infarctions or residual  
17 abnormalities on available scans. All echocardiograms were reviewed, and data regarding left  
18 ventricular ejection fraction (LVEF), RV dilation, and RV dysfunction were collected.

#### 39 Statistical analysis

40 All continuous variables were tested for normality and presented as mean with a standard  
41 deviation (SD), or median with an interquartile range (IQR) if distribution was skewed.

42 Categorical variables were presented as absolute number (percentage). Comparisons between  
43 patients with and without infarction were performed using Student t-test or Mann-Whitney U for  
44 continuous variables, or Fischer's exact or  $X^2$  test for categorical variables, as appropriate.

45 Univariable and multivariable logistic regression models were used to evaluate risk factors

associated with pulmonary infarction. The software SPSS Statistics for Mac, version 26.0 (IBM Corp., Armonk, NY, USA) was used for statistical analysis. P-values of <0.05 (two-sided) were considered statistically significant.

## Results

### Patient characteristics

Out of 560 patients in the PERT registry, 62 cases were excluded due to diagnosis by other imaging modalities, and 2 cases were excluded after diagnosis of PE was ruled out. Hence, 496 patients were included in the study with a mean age of 58 years and 48% were female. Twenty-nine percent (143 of 496) of patients had evidence of pulmonary infarction on CTPA. Patients with pulmonary infarction were younger ( $52 \pm 15.9$  vs.  $61 \pm 16.6$  years,  $p < 0.001$ ) and with a significantly lower prevalence of comorbidities including cardiac disease (30% vs 42%,  $p = 0.014$ ), chronic kidney disease (CKD) (5% vs 42%,  $p = 0.018$ ), diabetes mellitus (17% vs 26%,  $p = 0.032$ ), hypothyroidism (4% vs 9%,  $p = 0.039$ ) and malignancy (16% vs 25%,  $p = 0.032$ ).

Although results did not reach statistical significance, chronic obstructive pulmonary disease (COPD) was less prevalent in the infarction group. Patients with infarction were more likely to present with pleuritic chest pain (32% vs 20%,  $p = 0.004$ ) and hemoptysis (8% vs 3%,  $p = 0.04$ ), while patients without infarction were more likely to present with syncope (6% vs 11%,  $p = 0.05$ ).

The baseline characteristics and symptoms of presentation of the study population are reported in Table 1.

Table 1. Baseline characteristics and symptoms of presentation.

|                       | All (496)     | Without infarction (353) | With infarction (143) | P-value |
|-----------------------|---------------|--------------------------|-----------------------|---------|
| Gender (female)       | 238 (48%)     | 168 (48%)                | 70 (49%)              | 0.784   |
| Age, mean ( $\pm$ SD) | $58 \pm 16.9$ | $61 \pm 16.6$            | $52 \pm 15.9$         | <0.001  |
| Race, n (%)           |               |                          |                       | 0.017   |
| Black                 | 249 (50%)     | 168 (48%)                | 81 (57%)              |         |

|                                 |                |                |                |       |
|---------------------------------|----------------|----------------|----------------|-------|
| White                           | 98 (20%)       | 81 (23%)       | 17 (12%)       |       |
| Other                           | 149 (30%)      | 104 (30%)      | 45 (32%)       |       |
| BMI, mean ( $\pm$ SD)           | 31.8 $\pm$ 9.3 | 31.8 $\pm$ 9.5 | 32.0 $\pm$ 8.7 | 0.421 |
| Symptoms at presentation, n (%) |                |                |                |       |
| Dyspnea                         | 297 (60%)      | 207 (59%)      | 90 (63%)       | 0.376 |
| Hypoxia                         | 237 (49%)      | 173 (50%)      | 64 (46%)       | 0.371 |
| Pleuritic chest pain            | 114 (23%)      | 69 (20%)       | 45 (32%)       | 0.004 |
| DVT symptoms                    | 50 (10%)       | 40 (11%)       | 10 (7%)        | 0.146 |
| Syncope                         | 48 (10%)       | 40 (11%)       | 8 (6%)         | 0.05  |
| Hemoptysis                      | 21 (4%)        | 9 (3%)         | 12 (8%)        | 0.04  |
| Altered mental status           | 38 (8%)        | 28 (8%)        | 10 (7%)        | 0.722 |
| Cardiac arrest                  | 22 (4%)        | 15 (4%)        | 7 (5%)         | 0.752 |
| Comorbidities, n (%)            |                |                |                |       |
| Cardiac diseases                | 191 (39%)      | 148 (42%)      | 43 (30%)       | 0.014 |
| COPD/asthma                     | 71 (14%)       | 54 (15%)       | 17 (12%)       | 0.326 |
| CKD                             | 49 (10%)       | 42 (12%)       | 7 (5%)         | 0.018 |
| Diabetes mellitus               | 115 (23%)      | 91 (26%)       | 24 (17%)       | 0.032 |
| Hypothyroidism                  | 36 (7%)        | 31 (9%)        | 5 (4%)         | 0.039 |
| Malignancy                      | 111 (22%)      | 88 (25%)       | 23 (16%)       | 0.032 |
| Recent surgery                  | 68 (14%)       | 52 (15%)       | 16 (11%)       | 0.299 |
| Current anticoagulation         | 59 (12%)       | 41 (12%)       | 18 (13%)       | 0.762 |

COPD= chronic obstructive pulmonary disease; CKD= chronic kidney disease; BMI= body mass index; DVT= deep vein thrombosis; SD= standard deviation.

### Risk stratification of PE

Troponin elevation ( $>0.1$ ng/ml) was less frequently observed in patients with infarction (39% vs 49%,  $p=0.031$ ). The presence of RV strain on CT was significantly higher in patients with infarction (58% vs 45%,  $p=0.009$ ), although no differences in signs of RV dilation or dysfunction on echocardiogram between infarction and non-infarction group were noted. There was no significant difference in sPESI risk group, BNP elevation, PE severity, or evidence of RV dysfunction on electrocardiography and echocardiogram between groups. Table 2 describes factors associated with PE severity.

Table 2. PE severity indices.

|                     | All (496) | Without infarction (353) | With infarction (143) | P-value |
|---------------------|-----------|--------------------------|-----------------------|---------|
| sPESI score         |           |                          |                       | 0.108   |
| Low risk (0 points) | 89 (21%)  | 57 (19%)                 | 32 (26%)              |         |

|                              |           |           |          |       |
|------------------------------|-----------|-----------|----------|-------|
| High risk ( $\geq 1$ points) | 327 (79%) | 238 (81%) | 89 (74%) |       |
| Elevated BNP                 | 242 (54%) | 169 (53%) | 73 (55%) | 0.629 |
| Elevated troponin            | 228 (46%) | 173 (49%) | 55 (39%) | 0.031 |
| Evidence of RV strain on EKG | 77 (16%)  | 48 (14%)  | 29 (21%) | 0.137 |
| PE severity                  |           |           |          |       |
| Low risk                     | 132 (27%) | 93 (26%)  | 39 (27%) | 0.994 |
| Intermediate low risk        | 173 (35%) | 124 (35%) | 49 (34%) |       |
| Intermediate high risk       | 144 (29%) | 103 (29%) | 41 (29%) |       |
| High risk                    | 47 (10%)  | 33 (9%)   | 14 (10%) |       |
| Elevated BNP                 | 242 (54%) | 169 (53%) | 73 (55%) | 0.629 |
| Elevated troponin            | 228 (46%) | 173 (49%) | 55 (39%) | 0.031 |
| EKG evidence of RV strain    | 77 (16%)  | 48 (14%)  | 29 (21%) | 0.137 |
| CT evidence of RV strain     | 242 (49%) | 159 (45%) | 83 (58%) | 0.009 |
| Echocardiogram               |           |           |          |       |
| RV dilation                  | 251 (54%) | 173 (52%) | 78 (57%) | 0.302 |
| RV dysfunction               | 235 (50%) | 162 (49%) | 73 (54%) | 0.338 |
| LVEF                         | 38 (8%)   | 23 (7%)   | 15 (11%) | 0.306 |
| LE DVT                       | 227 (50%) | 161 (51%) | 66 (50%) | 0.928 |
| UE DVT                       | 39 (22%)  | 27 (22%)  | 12 (21%) | 0.916 |

BNP= B-type natriuretic peptide; CT= computed tomography; DVT= deep vein thrombosis; EKG= electrocardiography; LE= lower extremity; LVEF= left ventricular ejection function; sPESI= simplified pulmonary embolism severity index; RV= right ventricular; LVEF= left ventricular ejection fraction; PE= pulmonary embolism; UE= upper extremity

Radiographic characteristics

There was no difference in PE distribution and clot burden between groups and 50% of patients with infarction had thrombus located at the main PAs including those who had saddle PE. Most infarctions occurred in the lower lobe (60%) and involved a single lobe (64%). Patients with infarction were more likely to have parenchymal abnormalities including consolidation (21% vs 12%,  $p= 0.007$ ), pulmonary edema (13% vs 7%,  $p= 0.036$ ), pleural effusion (33% vs 24%,  $p=0.038$ ) and ground glass opacity (20% vs 13%,  $p= 0.042$ ). Table 3a demonstrates the radiographic characteristics of patients with acute PE. Table 3b demonstrates the radiographic characteristics of pulmonary infarction. Fifty-eight (41%) patients had follow-up CT-chest imaging for a variety of reasons performed up to 1-year post-discharge. Resolution of pulmonary infarction was observed in 53% (17 out of 32), 85% (12 out of 14), and 92% (11 out of 12) of patients who had imaging at 3-month, 6-month, and 1-year intervals.

Table 3a. Radiographic characteristics of patients with acute pulmonary embolism.

|                           | All (496) | Without infarction (353) | With infarction (143) | P-value |
|---------------------------|-----------|--------------------------|-----------------------|---------|
| RV strain on CT           | 242 (49%) | 159 (45%)                | 83 (58%)              | 0.009   |
| RV to LV ratio $\geq 1$   | 155 (31%) | 106 (30%)                | 49 (34%)              | 0.640   |
| Dilated PA                | 99 (20%)  | 59 (17%)                 | 40 (28%)              | 0.011   |
| Septal position           |           |                          |                       | 0.030   |
| Rightward bowing          | 131 (27%) | 102 (29%)                | 29 (20%)              |         |
| Flattened                 | 112 (23%) | 66 (19%)                 | 46 (32%)              |         |
| Leftward bowing           | 50 (10%)  | 32 (9%)                  | 18 (13%)              |         |
| PE distribution           |           |                          |                       | 0.052   |
| Central PE                | 216 (44%) | 144 (41%)                | 72 (50%)              |         |
| Distal PE                 | 280 (57%) | 209 (59%)                | 71 (50%)              |         |
| Clot burden               |           |                          |                       | 0.200   |
| Main, saddle or proximal  | 215 (43%) | 143 (41%)                | 72 (50%)              |         |
| Interlobar to lobar       | 124 (25%) | 94 (27%)                 | 30 (21%)              |         |
| Segmental                 | 150 (30%) | 110 (31%)                | 40 (28%)              |         |
| Subsegmental              | 7 (1%)    | 6 (2%)                   | 1 (1%)                |         |
| Parenchymal abnormalities |           |                          |                       |         |
| Pulmonary edema           | 42 (9%)   | 24 (7%)                  | 18 (13%)              | 0.036   |
| Consolidation             | 71 (14%)  | 41 (12%)                 | 30 (21%)              | 0.007   |
| Emphysema                 | 65 (13%)  | 48 (14%)                 | 16 (11%)              | 0.469   |
| Fibrosis                  | 42 (9%)   | 30 (9%)                  | 12 (8%)               | 0.969   |
| Pleural effusion          | 128 (26%) | 84 (24%)                 | 47 (33%)              | 0.038   |
| Atelectasis               | 161 (33%) | 113 (32%)                | 48 (34%)              | 0.738   |
| Ground glass opacity      | 72 (15%)  | 44 (13%)                 | 28 (20%)              | 0.042   |

CT= computed tomography; LV= left ventricular; RV= right ventricular; PA= pulmonary artery; PE= pulmonary embolism

Table 3b. Radiographic characteristics of pulmonary infarction.

|                  | Infarcts, number (%) |
|------------------|----------------------|
| Infarct location |                      |
| Upper lobe       | 31 (22%)             |
| Middle lobe      | 8 (6%)               |
| Lower lobe       | 86 (60%)             |
| Multiple         | 18 (12%)             |
| Infarct burden   |                      |
| Single lobe      | 91 (64%)             |
| Multiple lobes   | 52 (36%)             |

Treatment and outcomes

1  
2  
3 There was no significant difference in the number of patients receiving advanced reperfusion  
4 therapy between groups. Most patients with pulmonary infarction received anticoagulation alone  
5 (69%), followed by catheter-directed thrombolysis (12%), and systemic thrombolysis (11%).  
6  
7

8  
9  
10 There were more patients with infarction who received antimicrobial therapy compared to those  
11 without infarction (15% vs 5%,  $p < 0.001$ ). Among the 47 patients who had concomitant  
12 infarction and pleural effusion, six patients (13%) underwent diagnostic and/or therapeutic  
13 thoracocentesis and five had an exudative pleural effusion. Patients with infarction were less  
14 likely to require oxygen on discharge (11% vs 19%,  $p = 0.031$ ), and those who required oxygen  
15 on discharge were more likely to have multiple lobe infarctions than single lobe infarction (19%  
16 vs 7%,  $p = 0.032$ ). There was no significant difference between patients with infarction and  
17 without infarction regarding length of stay ( $10.7 \pm 14.7$  vs  $9.5 \pm 12.3$ ,  $p = 0.698$ ), in-hospital death  
18 (7% vs 8%,  $p = 0.801$ ), disposition (home: 78% vs 75%,  $p = 0.759$ ), bleeding complications (24%  
19 vs 12%,  $p = 0.089$ ) and readmission within 30 days (18% vs 16%,  $p = 0.584$ ) (Supplemental  
20 material online, table 1).  
21  
22  
23  
24  
25  
26  
27  
28  
29  
30  
31  
32  
33  
34

35 Patients with infarction who underwent CDT had a longer length of stay ( $15 \pm 24.4$  vs  $7 \pm 8.4$ ,  
36  $p = 0.044$ ) and a higher rate of readmission within 30 days (18% vs 2%,  $p = 0.047$ ), compared to  
37 those without infarction. Readmission diagnoses of patients with infarction who underwent CDT  
38 were as follows: one patient developed vaginal bleeding from anticoagulant use, one patient  
39 developed acute hypoxic respiratory failure due to multifocal pneumonia, and one patient was  
40 admitted for chest pain. There was no significant difference in in-hospital mortality (6% vs 6%,  
41  $p = 0.973$ ) and complications including minor and major bleeding (24% vs 21%,  $p = 0.676$ ), access  
42 site hematoma (13% vs 2%,  $p = 0.134$ ) and need for transfusion (18% vs 13%,  $p = 0.649$ ) between  
43 those with and without infarction (Supplemental material online, table 2).  
44  
45  
46  
47  
48  
49  
50  
51  
52  
53  
54  
55  
56  
57  
58  
59  
60



In univariable regression analyses, we identified several factors independently associated with pulmonary infarction. These included age, history of cardiac diseases, malignancy, hypothyroidism, diabetes mellitus, CKD, elevated troponin, pleuritic chest pain, hemoptysis, and RV strain on CT. A multivariable regression analysis was subsequently performed, and four factors remained significant: Both hemoptysis (OR, 3.034; 95% CI, 1.162-7.924) and presence of RV strain on CT (OR, 2.142; 95% CI 1.365-3.360) significantly increased the risk of infarction, while age (OR, 0.973, 95% CI, 0.959-0.987) and presence of elevated troponin (OR, 0.629; 95% CI 0.398-0.993) decreased risk (Table 4).

Table 4. Univariate and multivariate analysis of potential risk factors.

| Variables         | Variables                |                       | Univariate analysis |         |             | Multivariate analysis |         |             |
|-------------------|--------------------------|-----------------------|---------------------|---------|-------------|-----------------------|---------|-------------|
|                   | Without infarction (353) | With infarction (143) | Odds ratio          | P-value | 95% CI      | Odds ratio            | P-value | 95% CI      |
| Age, years        | 61 ± 16.6                | 52 ± 15.9             | 0.968               | <0.001  | 0.956-0.980 | 0.973                 | <0.001  | 0.959-0.987 |
| Cardiac diseases  | 148 (42%)                | 43 (30%)              | 0.596               | 0.014   | 0.393-0.902 |                       |         |             |
| CKD               | 42 (12%)                 | 7 (5%)                | 0.381               | 0.022   | 0.167-0.870 |                       |         |             |
| DM                | 91 (26%)                 | 24 (17%)              | 0.581               | 0.033   | 0.352-0.957 |                       |         |             |
| Malignancy        | 88 (25%)                 | 23 (16%)              | 0.577               | 0.034   | 0.348-0.958 |                       |         |             |
| Hypothyroidism    | 31 (9%)                  | 5 (4%)                | 0.375               | 0.047   | 0.143-0.985 |                       |         |             |
| Elevated troponin | 173 (49%)                | 55 (39%)              | 0.647               | 0.032   | 0.435-0.962 | 0.629                 | 0.047   | 0.398-0.993 |
| Pleuritic CP      | 69 (20%)                 | 45 (32%)              | 1.890               | 0.005   | 1.217-2.935 |                       |         |             |
| Hemoptysis        | 9 (3%)                   | 12 (8%)               | 3.491               | 0.006   | 1.437-8.479 | 3.034                 | 0.023   | 1.162-7.924 |
| RV strain on CT   | 159 (45%)                | 83 (58%)              | 1.688               | 0.009   | 1.140-2.500 | 2.142                 | <0.001  | 1.365-3.360 |

CP= chest pain; CKD= chronic kidney disease; CT= computed tomography DM= diabetes mellites; RV= right ventricular

## Discussion

In this study, the estimated prevalence of pulmonary infarction was 29%. Patients with infarction were more likely to present with pleuritic chest pain and hemoptysis. Additionally, those with pulmonary infarction were younger and had a lower prevalence of comorbidities. While the presence of RV strain on CT imaging was more common in patients with pulmonary infarction, the rate of reperfusion therapies, complications, and outcomes was similar in both groups. The presence of hemoptysis and RV strain on CT significantly increased the risk of infarction, whereas age and elevated troponin decreased the risk. Pulmonary infarction resolved in the

1  
2  
3 majority of patients for whom follow-up imaging was available, which is in concordance with  
4  
5 newer studies (8, 9, 13).  
6

7  
8 The prevalence of pulmonary infarction in our cohort is in keeping with previously reported rates  
9  
10 ranging from 9% to 36% (3, 13). Regarding clinical presentation, the higher presence of pleuritic  
11  
12 chest pain and hemoptysis in patients with infarction likely represents a result of alveolar  
13  
14 hemorrhage, leading to pleural inflammation, irritation, and necrosis. In addition, the presence of  
15  
16 pleural effusion was more prevalent in patients with infarction due to pleural inflammation  
17  
18 following infarction, however, most of these effusions were not intervened upon and had  
19  
20 resolved on follow-up imaging. Although patients with infarction were more likely to present  
21  
22 with pleuritic chest pain and hemoptysis, these symptoms were only present in 32% and 8% of  
23  
24 patients with infarction respectively. Thus, it is important to note that the majority remained  
25  
26 asymptomatic, and thus the presence of these symptoms may not be useful in identifying  
27  
28 pulmonary infarction. Interestingly, patients with pulmonary infarction were more likely to be  
29  
30 treated with antimicrobial therapy than those without. One possible explanation is that other lung  
31  
32 processes, such as pneumonia, pulmonary edema, or atelectasis can produce consolidative  
33  
34 changes similar to infarction on CT imaging (14), and as a result, pneumonia cannot be excluded  
35  
36 especially when combined with a clinically compatible presentation.  
37  
38  
39  
40  
41

42 In our study, patients with infarction were significantly younger and with fewer comorbid  
43  
44 conditions, specifically a lower prevalence of cardiac disease and malignancy that have  
45  
46 traditionally been regarded as major risk factors for infarction. This discrepancy may be due to a  
47  
48 lack of efficient collateral circulation to lung tissues, which presumably develops in the setting of  
49  
50 longstanding local tissue hypoxia (8, 15), and is unlikely to happen in otherwise healthy, young  
51  
52 individuals in the absence of cardiopulmonary diseases.  
53  
54  
55  
56  
57  
58  
59  
60

1  
2  
3 Our cohort also found that patients with infarction did have higher rates of RV strain, dilated PA,  
4 and flattened or leftward bowing of the interventricular septum, although signs of RV strain were  
5 not reproducible on echocardiography. A potential explanation for this finding is that patients  
6 with infarction were younger with less comorbid diseases, thus without pre-existing RV  
7 hypertrophy allowing for tolerance of acute RV afterload elevation. This may also explain our  
8 finding that troponin elevation was less likely to be observed in patients with infarction. While  
9 troponin elevation is indicative of RV strain, RV myocardium might not necessarily be its only  
10 source (16). A mismatch between oxygen demand and supply (demand ischemia) and a decrease  
11 in renal clearance could contribute to the higher rates of troponin elevation observed in patients  
12 without infarction, as evidenced by their higher prevalence of comorbidities.  
13  
14

15  
16  
17 Regarding the discrepancy between CT and echocardiographic findings, unlike CTPA which is  
18 often the first diagnostic and confirmatory modality for PE, most echocardiography is performed  
19 after the initial diagnosis and potentially after reperfusion therapy. In our study, the mean and  
20 median time lapse between the availability of CT results to echocardiogram results was 29 hours  
21 40 minutes and 20 hours 11 minutes respectively. Thus, it is possible that the initial signs of RV  
22 strain shown on CTPA could have improved or resolved through several potential mechanisms;  
23 administration of supplemental oxygen leading to a reversal of hypoxic vasoconstriction, clot  
24 burden reduction using reperfusion therapy, or intrinsic thrombolytic activity with  
25 anticoagulation support alone.  
26  
27

28  
29  
30 Importantly, we demonstrated no differences in complication rates and in-hospital mortality in  
31 patients who underwent CDT with pulmonary infarction compared to those without, although  
32 patients with infarction had a longer length of stay and a higher rate of 30-day readmission for  
33 non-PE or CDT-related diagnoses. There remains a theoretical risk of increased bleeding  
34  
35  
36  
37  
38  
39  
40  
41  
42  
43  
44  
45  
46  
47  
48  
49  
50  
51  
52  
53  
54  
55  
56  
57  
58  
59  
60

1  
2  
3 complications in the area of pulmonary infarction during catheter manipulation and local  
4 installation of thrombolytics, however, this was not demonstrated in our cohort.  
5  
6

### 7 Study Limitations

8  
9  
10 To the best of our knowledge, this study represented the largest cohort of patients with acute PE  
11 complicated by pulmonary infarction, however, there are several limitations in our study. Cases  
12 of pulmonary infarction were identified based on CT findings and there was no histological  
13 correlation to differentiate between true necrosis versus alveolar hemorrhage. Patients with  
14 conditions that led to pulmonary hypertension could have pre-existing parenchymal changes that  
15 resemble acute RV strain caused by PE. In those scenarios, it would be technically difficult to  
16 differentiate whether these CT features are related to pre-existing pulmonary hypertension itself,  
17 or the combination. Owing to the retrospective nature of this study, not all patients underwent  
18 CT imaging post-discharge, thus we were unable to comment on the precise timing of the  
19 resolution of pulmonary infarction. We acknowledge the fact that not all patients in our cohort  
20 had echocardiography, in particular, patients with low-risk PE when echocardiography was not  
21 deemed necessary to change management or patients with high-risk PE who expired prior to the  
22 completion of echocardiography. Other limitations included the retrospective, single-center  
23 nature of the data, which may be prone to selection bias.  
24  
25  
26  
27  
28  
29  
30  
31  
32  
33  
34  
35  
36  
37  
38  
39  
40  
41

42 In conclusion, pulmonary infarction was demonstrated on CT in nearly one-third of acute PE,  
43 and patients with infarction were younger, with fewer comorbidities, and more likely to present  
44 with pleuritic chest pain and hemoptysis. Overall, there was no difference in length of stay, in-  
45 hospital death, bleeding complication, and readmission rate between patients with and without  
46 infarction, and patients with infarction were less likely to require oxygen on discharge. The  
47 presence of pulmonary infarction did not correlate with poorer outcomes and should not be  
48  
49  
50  
51  
52  
53  
54  
55  
56  
57  
58  
59  
60

1  
2  
3 considered a supporting factor nor a contraindication for advanced reperfusion therapy for PE.

4  
5 **Author contributions:** KUL is the primary author, collected and analyzed the data, and is the  
6  
7 guarantor of the article, taking responsibility for the integrity of the work as a whole from  
8  
9 inception to the published article. OO and PR are responsible for the study concept and helped  
10  
11 write the manuscript. RB, GC, VL, and JP reviewed the imaging studies and treated the patients  
12  
13 who underwent catheter-directed thrombolysis. SB and BRL helped write the manuscript.  
14  
15

16  
17 **Conflict of interest:** There are no financial or other conflicts of interest to disclose.  
18

19  
20 **Ethics approval:** This study was approved by the Institutional Review Board (Protocol #26021)  
21  
22 at Temple University Hospital and informed consent was waived due to the retrospective nature  
23  
24 of the study.  
25

26  
27 **Patient consent for publication:** Not required.  
28

29  
30 **Funding statement:** This study received no funding.

31  
32 **Data sharing statement:** All data relevant to the study are included in the article or uploaded as  
33  
34 supplementary information.  
35  
36  
37  
38  
39  
40  
41  
42  
43  
44  
45  
46  
47  
48  
49  
50  
51  
52  
53  
54  
55  
56  
57  
58  
59  
60

## Reference

1. Barco S, Valerio L, Ageno W, Cohen AT, Goldhaber SZ, Hunt BJ, Iorio A, Jimenez D, Klok FA, Kucher N, Mahmoudpour SH, Middeldorp S, Münzel T, Tagalakis V, Wendelboe AM, Konstantinides SV. Age-sex specific pulmonary embolism-related mortality in the USA and Canada, 2000–18: an analysis of the WHO Mortality Database and of the CDC Multiple Cause of Death database. *The Lancet Respiratory Medicine* 2021; 9: 33-42.
2. Raskob GE, Angchaisuksiri P, Blanco AN, Buller H, Gallus A, Hunt BJ, Hylek EM, Kakkar A, Konstantinides SV, McCumber M, Ozaki Y, Wendelboe A, Weitz JI. Thrombosis: a major contributor to global disease burden. *Arterioscler Thromb Vasc Biol* 2014; 34: 2363-2371.
3. Heyer CM, Lemburg SP, Knoop H, Holland-Letz T, Nicolas V, Roggenland D. Multidetector-CT angiography in pulmonary embolism—can image parameters predict clinical outcome? *European Radiology* 2011; 21: 1928-1937.
4. Osiro S, Wear C, Hudson R, Ma XX, Zurada A, Michalak M, Loukas M. A friend to the airways: a review of the emerging clinical importance of the bronchial arterial circulation. *Surg Radiol Anat* 2012; 34: 791-798.
5. Pump KK. The bronchial arteries and their anastomoses in the human lung. *Dis Chest* 1963; 43: 245-255.
6. Hampton AO, Castleman BL. Correlation of postmortem chest teleroentgenograms with autopsy findings with special reference to pulmonary embolism and infarction. 1940.
7. Tsao MS, Schraufnagel D, Wang NS. Pathogenesis of pulmonary infarction. *Am J Med* 1982; 72: 599-606.
8. Islam M, Filopei J, Frank M, Ramesh N, Verzosa S, Ehrlich M, Bondarsky E, Miller A, Steiger D. Pulmonary infarction secondary to pulmonary embolism: An evolving paradigm. *Respirology* 2018.
9. Miniati M, Bottai M, Ciccotosto C, Roberto L, Monti S. Predictors of Pulmonary Infarction. *Medicine (Baltimore)* 2015; 94: e1488.
10. Konstantinides SV, Meyer G, Becattini C, Bueno H, Geersing GJ, Harjola VP, Huisman MV, Humbert M, Jennings CS, Jiménez D, Kucher N, Lang IM, Lankeit M, Lorusso R, Mazzolai L, Meneveau N, F NÁ, Prandoni P, Pruszczyk P, Righini M, Torbicki A, Van Belle E, Zamorano JL. 2019 ESC Guidelines for the diagnosis and management of acute pulmonary embolism developed in collaboration with the European Respiratory Society (ERS). *Eur Heart J* 2020; 41: 543-603.
11. Schulman S, Kearon C. Definition of major bleeding in clinical investigations of antihemostatic medicinal products in non-surgical patients. *J Thromb Haemost* 2005; 3: 692-694.
12. Revel M-P, Triki R, Chatellier G, Couchon S, Haddad N, Hernigou A, Danel C, Frija G. Is It Possible to Recognize Pulmonary Infarction on Multisection CT Images? *Radiology* 2007; 244: 875-882.
13. Cha S-I, Shin K-M, Lee J, Hwangbo Y, Yoo S-S, Lee J, Lee S-Y, Kim C-H, Park J-Y, Jung T-H. Clinical relevance of pulmonary infarction in patients with pulmonary embolism. *Thrombosis Research* 2012; 130: e1-e5.

- 1  
2  
3 14. Ren H, Kuhlman JE, Hruban RH, Fishman EK, Wheeler PS, Hutchins GM. CT of inflation-fixed  
4 lungs: wedge-shaped density and vascular sign in the diagnosis of infarction. *J Comput*  
5 *Assist Tomogr* 1990; 14: 82-86.  
6  
7 15. Malik AB, Tracy SE. Bronchovascular adjustments after pulmonary embolism. *Journal of*  
8 *Applied Physiology* 1980; 49: 476-481.  
9  
10 16. Becattini C, Vedovati MC, Agnelli G. Prognostic value of troponins in acute pulmonary  
11 embolism: a meta-analysis. *Circulation* 2007; 116: 427-433.  
12  
13  
14  
15  
16  
17  
18  
19  
20  
21  
22  
23  
24  
25  
26  
27  
28  
29  
30  
31  
32  
33  
34  
35  
36  
37  
38  
39  
40  
41  
42  
43  
44  
45  
46  
47  
48  
49  
50  
51  
52  
53  
54  
55  
56  
57  
58  
59  
60

1  
2  
3  
4  
5  
6  
7  
8  
9  
10  
11  
12  
13  
14  
15  
16  
17  
18  
19  
20  
21  
22  
23  
24  
25  
26  
27  
28  
29  
30  
31  
32  
33  
34  
35  
36  
37  
38  
39  
40  
41  
42  
43  
44  
45  
46  
47  
48  
49  
50  
51  
52  
53  
54  
55  
56  
57  
58  
59  
60

Figure 1. Patient selection flow diagram.

For peer review only



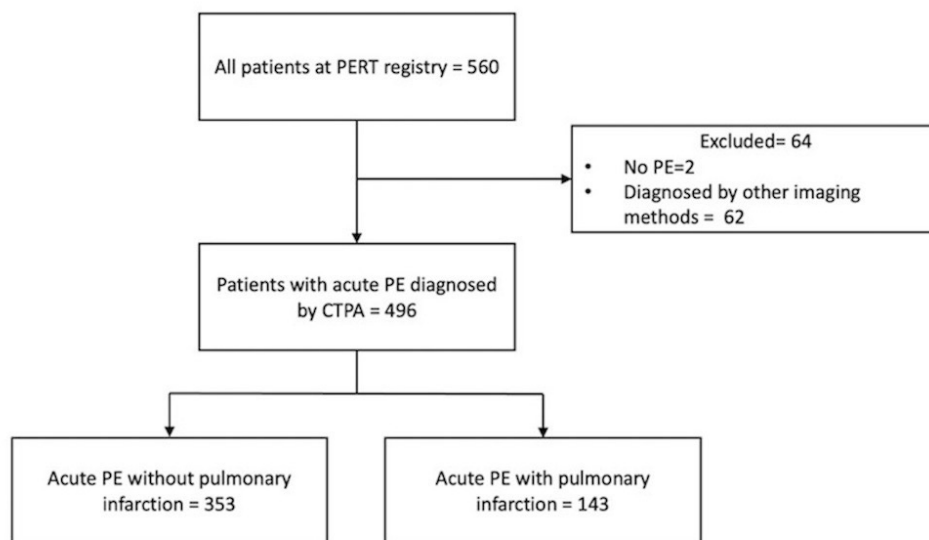

Figure 1. Patient selection flow diagram.

32x19mm (800 x 800 DPI)

Supplemental material, table 1. Treatment and outcomes between patients with and without infarction.

|                            | All (496)  | Without infarction (353) | With infarction (143) | P-value |
|----------------------------|------------|--------------------------|-----------------------|---------|
| Anticoagulation alone      | 357 (72%)  | 259 (73%)                | 98 (69%)              | 0.545   |
| CDT                        | 70 (14%)   | 53 (15%)                 | 17 (12%)              | 0.365   |
| Thrombolysis               |            |                          |                       | 0.212   |
| Half dose                  | 25 (5%)    | 15 (4%)                  | 10 (7%)               |         |
| Full dose                  | 14 (3%)    | 8 (2%)                   | 6 (4%)                |         |
| Mechanical thrombectomy    | 19 (4%)    | 10 (3%)                  | 9 (6%)                | 0.069   |
| Surgical thrombectomy      | 9 (2%)     | 6 (2%)                   | 3 (2%)                | 0.763   |
| ECMO                       | 11 (2%)    | 6 (2%)                   | 5 (4%)                | 0.218   |
| Mechanical ventilation     | 48 (10%)   | 30 (9%)                  | 18 (13%)              | 0.163   |
| Antimicrobials             | 39 (8%)    | 19 (5%)                  | 22 (15%)              | <0.001  |
| In-hospital death          | 37 (8%)    | 27 (8%)                  | 10 (7%)               | 0.801   |
| Disposition                |            |                          |                       | 0.759   |
| Home                       | 349 (76%)  | 245 (75%)                | 104 (78%)             |         |
| ECF                        | 100 (22%)  | 74 (23%)                 | 26 (20%)              |         |
| Hospice                    | 10 (2%)    | 7 (2%)                   | 3 (2%)                |         |
| Length of stay, days       | 10±13.0    | 9.5±12.3                 | 10.7±14.7             | 0.698   |
| Bleeding complication      |            |                          |                       | 0.089   |
| Minor bleeding             | 31 (6%)    | 25 (7%)                  | 6 (4%)                |         |
| Major bleeding             | 32 (7%)    | 18 (5%)                  | 14 (10%)              |         |
| Need for transfusion       | 63 (13%)   | 41 (12%)                 | 22 (16%)              | 0.253   |
| Readmission within 30 days | 76 (16.6%) | 52 (16%)                 | 24 (18%)              | 0.584   |
| New O2 on discharge        | 75 (16%)   | 61 (19%)                 | 14 (11%)              | 0.031   |
| Pulmonary follow-up        | 199 (42%)  | 144 (44%)                | 55 (40%)              | 0.610   |

CDT= catheter-directed thrombolysis; ECMO= extracorporeal membrane oxygenation;  
ECF= extended care facility

Supplemental material, table 2. Outcomes and complication rates in CDT.

|                            | All (70) | Without infarction (53) | With infarction (17) | P-value |
|----------------------------|----------|-------------------------|----------------------|---------|
| In-hospital death          | 4 (6%)   | 3 (6%)                  | 1 (6%)               | 0.973   |
| Disposition                |          |                         |                      | 0.436   |
| Home                       | 57 (86%) | 42 (84%)                | 15 (94%)             |         |
| ECF                        | 9 (14%)  | 8 (16%)                 | 1 (7%)               |         |
| Length of Stay             | 9±14.2   | 7±8.4                   | 15±24.4              | 0.044   |
| Readmission within 30 days | 4 (6%)   | 1 (2%)                  | 3 (18%)              | 0.047   |
| New O2 on discharge        | 10 (16%) | 8 (17%)                 | 2 (12%)              | 0.609   |
| Pulmonary follow-up        | 47 (72%) | 38 (76%)                | 9 (56%)              | 0.166   |
| <b>Complications</b>       |          |                         |                      |         |
| Bleeding                   |          |                         |                      | 0.676   |
| Minor                      | 10 (14%) | 8 (15%)                 | 2 (12%)              |         |
| Major                      | 5 (7%)   | 3 (6%)                  | 2 (12%)              |         |
| RBC transfusion            | 10 (14%) | 7 (13%)                 | 3 (18%)              | 0.649   |
| Access site hematoma       | 3 (5%)   | 1 (2%)                  | 2 (13%)              | 0.134   |

ECF= extended care facility; RBC= red blood cell

1  
2  
3  
4  
5  
6  
7  
8  
9  
10  
11  
12  
13  
14  
15  
16  
17  
18  
19  
20  
21  
22  
23  
24  
25  
26  
27  
28  
29  
30  
31  
32  
33  
34  
35  
36  
37  
38  
39  
40  
41  
42  
43  
44  
45  
46  
47  
48  
49  
50  
51  
52  
53  
54  
55  
56  
57  
58  
59  
60

For peer review only

**The RECORD statement – checklist of items, extended from the STROBE statement, that should be reported in observational studies using routinely collected health data.**

|                           | Item No. | STROBE items                                                                                                                                                                               | Location in manuscript where items are reported | RECORD items                                                                                                                                                                                                                                                                                                                                                                                                                                | Location in manuscript where items are reported |
|---------------------------|----------|--------------------------------------------------------------------------------------------------------------------------------------------------------------------------------------------|-------------------------------------------------|---------------------------------------------------------------------------------------------------------------------------------------------------------------------------------------------------------------------------------------------------------------------------------------------------------------------------------------------------------------------------------------------------------------------------------------------|-------------------------------------------------|
| <b>Title and abstract</b> |          |                                                                                                                                                                                            |                                                 |                                                                                                                                                                                                                                                                                                                                                                                                                                             |                                                 |
|                           | 1        | (a) Indicate the study's design with a commonly used term in the title or the abstract (b) Provide in the abstract an informative and balanced summary of what was done and what was found | (a) Page 2, line 3-4<br>(b) Page 4              | RECORD 1.1: The type of data used should be specified in the title or abstract. When possible, the name of the databases used should be included.<br><br>RECORD 1.2: If applicable, the geographic region and timeframe within which the study took place should be reported in the title or abstract.<br><br>RECORD 1.3: If linkage between databases was conducted for the study, this should be clearly stated in the title or abstract. | 1.1: Page 2, line 3-4<br>1.2: Page 2, line 3-4  |
| <b>Introduction</b>       |          |                                                                                                                                                                                            |                                                 |                                                                                                                                                                                                                                                                                                                                                                                                                                             |                                                 |
| Background rationale      | 2        | Explain the scientific background and rationale for the investigation being reported                                                                                                       | Page 6, line 5-35                               |                                                                                                                                                                                                                                                                                                                                                                                                                                             |                                                 |
| Objectives                | 3        | State specific objectives, including any prespecified hypotheses                                                                                                                           | Page 6, line 36-40                              |                                                                                                                                                                                                                                                                                                                                                                                                                                             |                                                 |
| <b>Methods</b>            |          |                                                                                                                                                                                            |                                                 |                                                                                                                                                                                                                                                                                                                                                                                                                                             |                                                 |
| Study Design              | 4        | Present key elements of study design early in the paper                                                                                                                                    | Page 6                                          |                                                                                                                                                                                                                                                                                                                                                                                                                                             |                                                 |
| Setting                   | 5        | Describe the setting, locations, and relevant dates, including periods of recruitment, exposure, follow-up, and data collection                                                            | Page 6, line 47- page 7, line 10                |                                                                                                                                                                                                                                                                                                                                                                                                                                             |                                                 |

|                                                                                                                                                                                                            |          |                                                                                                                                                                                                                                                                                                                                                                                                                                                                                                                                                                                                                                                                                                                        |                                         |                                                                                                                                                                                                                                                                                                                                                                                                                                                                                                                                                                                                                                                                                                      |                                                                                              |
|------------------------------------------------------------------------------------------------------------------------------------------------------------------------------------------------------------|----------|------------------------------------------------------------------------------------------------------------------------------------------------------------------------------------------------------------------------------------------------------------------------------------------------------------------------------------------------------------------------------------------------------------------------------------------------------------------------------------------------------------------------------------------------------------------------------------------------------------------------------------------------------------------------------------------------------------------------|-----------------------------------------|------------------------------------------------------------------------------------------------------------------------------------------------------------------------------------------------------------------------------------------------------------------------------------------------------------------------------------------------------------------------------------------------------------------------------------------------------------------------------------------------------------------------------------------------------------------------------------------------------------------------------------------------------------------------------------------------------|----------------------------------------------------------------------------------------------|
| <p>1<br/>2<br/>3<br/>4<br/>5<br/>6<br/>7<br/>8<br/>9<br/>10<br/>11<br/>12<br/>13<br/>14<br/>15<br/>16<br/>17<br/>18<br/>19<br/>20<br/>21<br/>22<br/>23<br/>24<br/>25<br/>26<br/>27</p> <p>Participants</p> | <p>6</p> | <p>(a) <i>Cohort study</i> - Give the eligibility criteria, and the sources and methods of selection of participants. Describe methods of follow-up<br/> <i>Case-control study</i> - Give the eligibility criteria, and the sources and methods of case ascertainment and control selection. Give the rationale for the choice of cases and controls<br/> <i>Cross-sectional study</i> - Give the eligibility criteria, and the sources and methods of selection of participants</p> <p>(b) <i>Cohort study</i> - For matched studies, give matching criteria and number of exposed and unexposed<br/> <i>Case-control study</i> - For matched studies, give matching criteria and the number of controls per case</p> | <p>Page 6, line 47- page 7, line 10</p> | <p>RECORD 6.1: The methods of study population selection (such as codes or algorithms used to identify subjects) should be listed in detail. If this is not possible, an explanation should be provided.</p> <p>RECORD 6.2: Any validation studies of the codes or algorithms used to select the population should be referenced. If validation was conducted for this study and not published elsewhere, detailed methods and results should be provided.</p> <p>RECORD 6.3: If the study involved linkage of databases, consider use of a flow diagram or other graphical display to demonstrate the data linkage process, including the number of individuals with linked data at each stage.</p> | <p>6.1: Page 6, line 47- page 7, line 10</p> <p>6.2: not applicable</p> <p>6.3: figure 1</p> |
| <p>28<br/>29<br/>30<br/>31<br/>32<br/>33<br/>34</p> <p>Variables</p>                                                                                                                                       | <p>7</p> | <p>Clearly define all outcomes, exposures, predictors, potential confounders, and effect modifiers. Give diagnostic criteria, if applicable.</p>                                                                                                                                                                                                                                                                                                                                                                                                                                                                                                                                                                       | <p>Page 7</p>                           | <p>RECORD 7.1: A complete list of codes and algorithms used to classify exposures, outcomes, confounders, and effect modifiers should be provided. If these cannot be reported, an explanation should be provided.</p>                                                                                                                                                                                                                                                                                                                                                                                                                                                                               | <p>Page 7</p>                                                                                |
| <p>35<br/>36<br/>37<br/>38<br/>39<br/>40<br/>41<br/>42</p> <p>Data sources/<br/>measurement</p>                                                                                                            | <p>8</p> | <p>For each variable of interest, give sources of data and details of methods of assessment (measurement). Describe comparability of assessment methods if there is more than one group</p>                                                                                                                                                                                                                                                                                                                                                                                                                                                                                                                            | <p>Page 7</p>                           |                                                                                                                                                                                                                                                                                                                                                                                                                                                                                                                                                                                                                                                                                                      |                                                                                              |

|                                                                                                                                                                                                                                                                               |                                  |    |                                                                                                                                                                                                                                                                                                                                                                                                                                                                                                                                                                      |                    |                                                                                                                                                       |                                     |
|-------------------------------------------------------------------------------------------------------------------------------------------------------------------------------------------------------------------------------------------------------------------------------|----------------------------------|----|----------------------------------------------------------------------------------------------------------------------------------------------------------------------------------------------------------------------------------------------------------------------------------------------------------------------------------------------------------------------------------------------------------------------------------------------------------------------------------------------------------------------------------------------------------------------|--------------------|-------------------------------------------------------------------------------------------------------------------------------------------------------|-------------------------------------|
| 1<br>2<br>3<br>4<br>5<br>6<br>7<br>8<br>9<br>10<br>11<br>12<br>13<br>14<br>15<br>16<br>17<br>18<br>19<br>20<br>21<br>22<br>23<br>24<br>25<br>26<br>27<br>28<br>29<br>30<br>31<br>32<br>33<br>34<br>35<br>36<br>37<br>38<br>39<br>40<br>41<br>42<br>43<br>44<br>45<br>46<br>47 | Bias                             | 9  | Describe any efforts to address potential sources of bias                                                                                                                                                                                                                                                                                                                                                                                                                                                                                                            | Page 8, line 3-4   |                                                                                                                                                       |                                     |
|                                                                                                                                                                                                                                                                               | Study size                       | 10 | Explain how the study size was arrived at                                                                                                                                                                                                                                                                                                                                                                                                                                                                                                                            | Page 9, line 5-10  |                                                                                                                                                       |                                     |
|                                                                                                                                                                                                                                                                               | Quantitative variables           | 11 | Explain how quantitative variables were handled in the analyses. If applicable, describe which groupings were chosen, and why                                                                                                                                                                                                                                                                                                                                                                                                                                        | Page 7, line 17-54 |                                                                                                                                                       |                                     |
|                                                                                                                                                                                                                                                                               | Statistical methods              | 12 | (a) Describe all statistical methods, including those used to control for confounding<br>(b) Describe any methods used to examine subgroups and interactions<br>(c) Explain how missing data were addressed<br>(d) <i>Cohort study</i> - If applicable, explain how loss to follow-up was addressed<br><i>Case-control study</i> - If applicable, explain how matching of cases and controls was addressed<br><i>Cross-sectional study</i> - If applicable, describe analytical methods taking account of sampling strategy<br>(e) Describe any sensitivity analyses | Page 8, line 33-51 |                                                                                                                                                       |                                     |
|                                                                                                                                                                                                                                                                               | Data access and cleaning methods |    | ..                                                                                                                                                                                                                                                                                                                                                                                                                                                                                                                                                                   |                    | RECORD 12.1: Authors should describe the extent to which the investigators had access to the database population used to create the study population. | Page 6, line 47-<br>page 7, line 10 |

|                  |    |                                                                                                                                                                                                                                                                                                                                                 |                                                            |                                                                                                                                                                                                                                                                                                                    |                   |
|------------------|----|-------------------------------------------------------------------------------------------------------------------------------------------------------------------------------------------------------------------------------------------------------------------------------------------------------------------------------------------------|------------------------------------------------------------|--------------------------------------------------------------------------------------------------------------------------------------------------------------------------------------------------------------------------------------------------------------------------------------------------------------------|-------------------|
|                  |    |                                                                                                                                                                                                                                                                                                                                                 |                                                            | RECORD 12.2: Authors should provide information on the data cleaning methods used in the study.                                                                                                                                                                                                                    |                   |
| Linkage          |    | ..                                                                                                                                                                                                                                                                                                                                              |                                                            | RECORD 12.3: State whether the study included person-level, institutional-level, or other data linkage across two or more databases. The methods of linkage and methods of linkage quality evaluation should be provided.                                                                                          | Not applicable    |
| <b>Results</b>   |    |                                                                                                                                                                                                                                                                                                                                                 |                                                            |                                                                                                                                                                                                                                                                                                                    |                   |
| Participants     | 13 | (a) Report the numbers of individuals at each stage of the study ( <i>e.g.</i> , numbers potentially eligible, examined for eligibility, confirmed eligible, included in the study, completing follow-up, and analysed)<br>(b) Give reasons for non-participation at each stage.<br>(c) Consider use of a flow diagram                          | Page 9, line 5-10                                          | RECORD 13.1: Describe in detail the selection of the persons included in the study ( <i>i.e.</i> , study population selection) including filtering based on data quality, data availability and linkage. The selection of included persons can be described in the text and/or by means of the study flow diagram. | Page 9, line 5-10 |
| Descriptive data | 14 | (a) Give characteristics of study participants ( <i>e.g.</i> , demographic, clinical, social) and information on exposures and potential confounders<br>(b) Indicate the number of participants with missing data for each variable of interest<br>(c) <i>Cohort study</i> - summarise follow-up time ( <i>e.g.</i> , average and total amount) | Page 9, line 5-35;<br>Page 10, line 29-44<br>Table 1 and 2 |                                                                                                                                                                                                                                                                                                                    |                   |
| Outcome data     | 15 | <i>Cohort study</i> - Report numbers of outcome events or summary measures over time<br><i>Case-control study</i> - Report numbers in each exposure                                                                                                                                                                                             | Page 12, line 54 to<br>Page 13 line 13<br>Table 4          |                                                                                                                                                                                                                                                                                                                    |                   |



|                   |    |                                                                                                                                                                                                                                                                                                                                                                                                                 |                                                |                                                                                                                                                                                                                                                                                                          |                   |
|-------------------|----|-----------------------------------------------------------------------------------------------------------------------------------------------------------------------------------------------------------------------------------------------------------------------------------------------------------------------------------------------------------------------------------------------------------------|------------------------------------------------|----------------------------------------------------------------------------------------------------------------------------------------------------------------------------------------------------------------------------------------------------------------------------------------------------------|-------------------|
|                   |    | category, or summary measures of exposure<br><i>Cross-sectional study</i> - Report numbers of outcome events or summary measures                                                                                                                                                                                                                                                                                |                                                |                                                                                                                                                                                                                                                                                                          |                   |
| Main results      | 16 | (a) Give unadjusted estimates and, if applicable, confounder-adjusted estimates and their precision (e.g., 95% confidence interval). Make clear which confounders were adjusted for and why they were included<br>(b) Report category boundaries when continuous variables were categorized<br>(c) If relevant, consider translating estimates of relative risk into absolute risk for a meaningful time period | Page 12, line 54 to Page 13 line 13<br>Table 4 |                                                                                                                                                                                                                                                                                                          |                   |
| Other analyses    | 17 | Report other analyses done— e.g., analyses of subgroups and interactions, and sensitivity analyses                                                                                                                                                                                                                                                                                                              | Page 12, line 54 to Page 13 line 13<br>Table 4 |                                                                                                                                                                                                                                                                                                          |                   |
| <b>Discussion</b> |    |                                                                                                                                                                                                                                                                                                                                                                                                                 |                                                |                                                                                                                                                                                                                                                                                                          |                   |
| Key results       | 18 | Summarise key results with reference to study objectives                                                                                                                                                                                                                                                                                                                                                        | Page 14 line 36-55                             |                                                                                                                                                                                                                                                                                                          |                   |
| Limitations       | 19 | Discuss limitations of the study, taking into account sources of potential bias or imprecision. Discuss both direction and magnitude of any potential bias                                                                                                                                                                                                                                                      | Page 17 line 5-36                              | RECORD 19.1: Discuss the implications of using data that were not created or collected to answer the specific research question(s). Include discussion of misclassification bias, unmeasured confounding, missing data, and changing eligibility over time, as they pertain to the study being reported. | Page 17 line 5-36 |
| Interpretation    | 20 | Give a cautious overall interpretation of results considering objectives,                                                                                                                                                                                                                                                                                                                                       | Page 17 line 38-53                             |                                                                                                                                                                                                                                                                                                          |                   |

|                                                           |    |                                                                                                                                                               |                    |                                                                                                                                                          |                    |
|-----------------------------------------------------------|----|---------------------------------------------------------------------------------------------------------------------------------------------------------------|--------------------|----------------------------------------------------------------------------------------------------------------------------------------------------------|--------------------|
|                                                           |    | limitations, multiplicity of analyses, results from similar studies, and other relevant evidence                                                              |                    |                                                                                                                                                          |                    |
| Generalisability                                          | 21 | Discuss the generalisability (external validity) of the study results                                                                                         | Page 17 line 5-36  |                                                                                                                                                          |                    |
| <b>Other Information</b>                                  |    |                                                                                                                                                               |                    |                                                                                                                                                          |                    |
| Funding                                                   | 22 | Give the source of funding and the role of the funders for the present study and, if applicable, for the original study on which the present article is based | Page 18 line 24    |                                                                                                                                                          |                    |
| Accessibility of protocol, raw data, and programming code |    | ..                                                                                                                                                            | Page 18 line 26-27 | RECORD 22.1: Authors should provide information on how to access any supplemental information such as the study protocol, raw data, or programming code. | Page 18 line 26-27 |

\*Reference: Benchimol EI, Smeeth L, Guttman A, Harron K, Moher D, Petersen I, Sørensen HT, von Elm E, Langan SM, the RECORD Working Committee. The REporting of studies Conducted using Observational Routinely-collected health Data (RECORD) Statement. *PLoS Medicine* 2015; in press.

\*Checklist is protected under Creative Commons Attribution ([CC BY](https://creativecommons.org/licenses/by/4.0/)) license.

# BMJ Open

## Clinical Outcomes and Factors Associated with Pulmonary Infarction Following Acute Pulmonary Embolism: A Retrospective Observational Study at a US Academic Center

|                                 |                                                                                                                                                                                                                                                                                                                                                                                                                                                                                                                                                                                                                                                                                                                                                                                                                                                  |
|---------------------------------|--------------------------------------------------------------------------------------------------------------------------------------------------------------------------------------------------------------------------------------------------------------------------------------------------------------------------------------------------------------------------------------------------------------------------------------------------------------------------------------------------------------------------------------------------------------------------------------------------------------------------------------------------------------------------------------------------------------------------------------------------------------------------------------------------------------------------------------------------|
| Journal:                        | <i>BMJ Open</i>                                                                                                                                                                                                                                                                                                                                                                                                                                                                                                                                                                                                                                                                                                                                                                                                                                  |
| Manuscript ID                   | bmjopen-2022-067579.R2                                                                                                                                                                                                                                                                                                                                                                                                                                                                                                                                                                                                                                                                                                                                                                                                                           |
| Article Type:                   | Original research                                                                                                                                                                                                                                                                                                                                                                                                                                                                                                                                                                                                                                                                                                                                                                                                                                |
| Date Submitted by the Author:   | 28-Nov-2022                                                                                                                                                                                                                                                                                                                                                                                                                                                                                                                                                                                                                                                                                                                                                                                                                                      |
| Complete List of Authors:       | Lio, Ka U; Lewis Katz School of Medicine at Temple University, Department of Medicine<br>O'Corragain, Oisin; Lewis Katz School of Medicine at Temple University, Department of Thoracic Medicine and Surgery<br>Bashir, Riyaz ; Lewis Katz School of Medicine at Temple University, Cardiology<br>Brosnahan, Shari; NYU Langone Health, Pulmonary, Critical Care and Sleep Medicine<br>Cohen, Gary; Lewis Katz School of Medicine at Temple University, Radiology<br>Lakhter, Vladimir; Lewis Katz School of Medicine at Temple University, Cardiology<br>Panaro, Joseph; Lewis Katz School of Medicine at Temple University, Radiology<br>Rivera-Lebron, B; University of Pittsburgh School of Medicine, Pulmonary and Critical Care Medicine<br>Rali, Parth; Lewis Katz School of Medicine at Temple University, Thoracic Medicine and Surgery |
| <b>Primary Subject Heading</b>: | Respiratory medicine                                                                                                                                                                                                                                                                                                                                                                                                                                                                                                                                                                                                                                                                                                                                                                                                                             |
| Secondary Subject Heading:      | Cardiovascular medicine, General practice / Family practice, Intensive care, Radiology and imaging                                                                                                                                                                                                                                                                                                                                                                                                                                                                                                                                                                                                                                                                                                                                               |
| Keywords:                       | Thromboembolism < CARDIOLOGY, RESPIRATORY MEDICINE (see Thoracic Medicine), Thoracic medicine < INTERNAL MEDICINE                                                                                                                                                                                                                                                                                                                                                                                                                                                                                                                                                                                                                                                                                                                                |
|                                 |                                                                                                                                                                                                                                                                                                                                                                                                                                                                                                                                                                                                                                                                                                                                                                                                                                                  |

SCHOLARONE™  
Manuscripts



I, the Submitting Author has the right to grant and does grant on behalf of all authors of the Work (as defined in the below author licence), an exclusive licence and/or a non-exclusive licence for contributions from authors who are: i) UK Crown employees; ii) where BMJ has agreed a CC-BY licence shall apply, and/or iii) in accordance with the terms applicable for US Federal Government officers or employees acting as part of their official duties; on a worldwide, perpetual, irrevocable, royalty-free basis to BMJ Publishing Group Ltd ("BMJ") its licensees and where the relevant Journal is co-owned by BMJ to the co-owners of the Journal, to publish the Work in this journal and any other BMJ products and to exploit all rights, as set out in our [licence](#).

The Submitting Author accepts and understands that any supply made under these terms is made by BMJ to the Submitting Author unless you are acting as an employee on behalf of your employer or a postgraduate student of an affiliated institution which is paying any applicable article publishing charge ("APC") for Open Access articles. Where the Submitting Author wishes to make the Work available on an Open Access basis (and intends to pay the relevant APC), the terms of reuse of such Open Access shall be governed by a Creative Commons licence – details of these licences and which [Creative Commons](#) licence will apply to this Work are set out in our licence referred to above.

Other than as permitted in any relevant BMJ Author's Self Archiving Policies, I confirm this Work has not been accepted for publication elsewhere, is not being considered for publication elsewhere and does not duplicate material already published. I confirm all authors consent to publication of this Work and authorise the granting of this licence.

1  
2  
3 **Clinical Outcomes and Factors Associated with Pulmonary Infarction Following Acute**  
4 **Pulmonary Embolism: A Retrospective Observational Study at a US Academic Center**  
5

6  
7 Ka U Lio<sup>1</sup>, Oisin O'Corragain<sup>2</sup>, Riyaz Bashir<sup>3</sup>, Shari Brosnahan<sup>4</sup>, Gary Cohen<sup>5</sup>, Vladimir  
8  
9 Lakhter<sup>3</sup>, Joseph Panaro<sup>5</sup>, Belinda Rivera-Lebron<sup>6</sup>, Parth Rali<sup>2</sup>

- 10  
11  
12 1 Department of Medicine, Lewis Katz School of Medicine at Temple University,  
13  
14 Philadelphia, PA, United States  
15  
16  
17 2 Department of Thoracic Medicine and Surgery, Lewis Katz School of Medicine at Temple  
18  
19 University, Philadelphia, PA, United States  
20  
21  
22 3 Division of Cardiovascular Diseases, Lewis Katz School of Medicine at Temple University,  
23  
24 Philadelphia, PA, United States  
25  
26  
27 4 Division of Pulmonary, Critical Care and Sleep Medicine, New York University School of  
28  
29 Medicine, New York, NY, United States  
30  
31  
32 5 Department of Radiology, Lewis Katz School of Medicine at Temple University,  
33  
34 Philadelphia, PA, United States  
35  
36  
37 6 Division of Pulmonary and Critical Care Medicine, University of Pittsburgh Medical Center,  
38  
39 Pittsburgh, PA, United States

40 **Corresponding author:**

41  
42 Ka U Lio, MD

43  
44 Department of Medicine, Lewis Katz School of Medicine at Temple University

45  
46 3401 N Broad Street, Philadelphia, PA 19140

47  
48 Phone: +1-267-541-9536

49  
50 Fax number: +1-267-460-3850

51  
52 Email: [kau.lio@tuhs.temple.edu](mailto:kau.lio@tuhs.temple.edu)  
53  
54  
55  
56  
57  
58  
59  
60

1  
2  
3 **Word count:** 2643 words  
4

5 **Keywords:** pulmonary embolism, pulmonary infarction, venous thromboembolism, shortness of  
6  
7 breath, pleuritic chest pain  
8  
9

10 **Abbreviations:** BNP= B-type natriuretic peptide; CDT= catheter-directed thrombolysis; CKD=  
11  
12 chronic kidney disease; CT= computed tomography; CTPA= computed tomography pulmonary  
13  
14 angiography; PA= pulmonary artery; PE= Pulmonary embolism; RV= Right ventricular; sPESI=  
15  
16 simplified pulmonary embolism severity index  
17  
18  
19  
20  
21  
22  
23  
24  
25  
26  
27  
28  
29  
30  
31  
32  
33  
34  
35  
36  
37  
38  
39  
40  
41  
42  
43  
44  
45  
46  
47  
48  
49  
50  
51  
52  
53  
54  
55  
56  
57  
58  
59  
60

## Abstract

**Objective:** Pulmonary infarction is a common clinical and radiographic finding in acute pulmonary embolism (PE), yet the clinical relevance and prognostic significance of pulmonary infarction remain unclear. The study aims to investigate the clinical features, radiographic characteristics, impact of reperfusion therapy, and outcomes of patients with pulmonary infarction.

**Design, setting and participants:** A retrospective cohort study of 496 adult patients ( $\geq 18$  years of age) diagnosed with PE who were evaluated by the pulmonary embolism response team (PERT) at a tertiary academic referral center in the US. We collected baseline characteristics, laboratory, radiographic, and outcome data. Statistical analysis was performed by Student t-test, Mann-Whitney U test, Fischer's exact or  $X^2$  test where appropriate. Multivariate logistic regression was used to evaluate potential risk factors for pulmonary infarction.

**Results:** We identified 143 (29%) cases of pulmonary infarction in 496 patients with PE. Patients with infarction were significantly younger ( $52 \pm 15.9$  vs.  $61 \pm 16.6$  years,  $p < 0.001$ ) and with fewer comorbidities. Most infarctions occurred in the lower lobes (60%) and involved a single lobe (64%). The presence of right ventricular (RV) strain on computed tomography (CT) imaging was significantly more common in patients with infarction (21% vs 14%,  $p = 0.031$ ). There was no significant difference in advanced reperfusion therapy, in-hospital mortality, length of stay, and readmissions between groups. In multivariate analysis, age, and evidence of RV strain on CT and hemoptysis increased the risk of infarction.

**Conclusions:** Radiographic evidence of pulmonary infarction was demonstrated in nearly one-third of patients with acute PE. There was no difference in the rate of reperfusion therapies and the presence of infarction did not correlate with poorer outcomes.

**Strengths and limitations of this study:**

- This study represents the largest cohort describing the clinical characteristics and outcomes of patients with pulmonary infarction.
- This study highlights the potential role of pulmonary infarction in the risk stratification of acute PE.
- Cases of pulmonary infarction were identified based on CT findings and there was no histological correlation to differentiate between true necrosis (infarction) versus alveolar hemorrhage.
- Not all patients underwent CT imaging post-discharge and thus we are unable to comment on the precise timing of the resolution of infarction and its long-term significance.



## Introduction

Acute pulmonary embolism (PE) is the third leading cause of cardiovascular death following myocardial infarction and stroke, with approximately 100,000 annual deaths in the United States (1, 2). Pulmonary infarction is a common complication of acute PE with a reported radiographic prevalence of up to 36% (3). The dual blood supply of lungs has been thought to be protective against ischemic insults, with the bronchial circulation and other collateral vessels undergoing hypertrophy or remodeling to maintain blood flow to ischemic lung tissues through anastomoses at the level of alveoli and respiratory bronchioles (4, 5). Nevertheless, obstruction of the pulmonary artery by acute PE can cause infarction. In the past, the presence of infarction has been regarded as a sign of poor outcomes due to its association with compromised cardiac function, which leads to increased pulmonary venous pressure and impairment of forwarding flow through the bronchial circulation (6, 7). Contrarily, recent studies have suggested that younger, healthier patients are at the highest risk for infarction, because of their less robust collateral blood supply (8, 9). The clinical relevance and prognostic significance of pulmonary infarction remain unclear. The aim of this study is to investigate the clinical features, radiographic characteristics, impact of reperfusion therapy, and outcomes of patients with pulmonary infarction.

## Methods

### Study population

We conducted a single-center retrospective review of all patients between January 2017 and June 2020 at Temple University Hospital who underwent evaluation by the pulmonary embolism response team (PERT) and included all cases of acute PE diagnosed by computed tomography pulmonary angiography (CTPA). Cases of acute PE diagnosed by other imaging modalities were

1  
2  
3 excluded from the study. Cases of pulmonary infarction were identified by review of the final CT  
4 reports by board-certified thoracic radiologists. Our study met approval by the Institutional  
5 Review Board (Protocol #26021) and informed consent was waived due to the retrospective  
6 nature of the study. Figure 1 demonstrates patient selection.  
7  
8  
9

### 10 Patient and public involvement

11 Patients or the public were not involved in the design, recruitment, conduct, reporting, or  
12 dissemination of our research.  
13

### 14 Data Collection

#### 15 Clinical data

16 Patient demographic, clinical features, laboratory data, echocardiographic data, radiographic  
17 characteristics, and patient outcomes were extracted from electronic medical records.  
18

19 Demographics included age, gender, race, and body mass index (BMI). Clinical features  
20 included symptoms at presentation, comorbid conditions, calculated simplified pulmonary  
21 embolism severity index (sPESI), and PE severity per the European Society of Cardiology (ESC)  
22 guideline at the time of diagnosis (i.e., low, intermediate-low, intermediate-high, and high  
23 risk).<sup>(10)</sup> Laboratory data included B-type natriuretic peptide (BNP; positive if  $\geq 100$ pg/ml) and  
24 troponin I (positive if  $\geq 0.1$ ng/ml). Data regarding treatment modalities, length of stay, in-  
25 hospital mortality, readmission within 30 days, new oxygen requirement on discharge,  
26 complications including major and minor bleeding using the International Society on  
27 Thrombosis and Haemostasis (ISTH) criteria<sup>(11)</sup>, need for transfusion, access site hematoma,  
28 and pulmonary follow-up were recorded.  
29  
30  
31  
32  
33  
34  
35  
36  
37  
38  
39  
40  
41  
42  
43  
44  
45  
46  
47  
48  
49  
50

#### 51 Radiographic data

1  
2  
3 All CTPAs performed at the time of acute PE diagnosis were retrieved. The diagnosis of  
4 infarction was based on generally accepted criteria with the presence of a peripheral wedge-  
5 shaped consolidation within the region of an obstructed vessel, with or without the presence of  
6 the other suggestive findings including: (i) central lucency; (ii) vessel signs; (iii) and air  
7 bronchogram (12). In case of discrepancies, a final decision was reached by consensus. A central  
8 PE was defined as the presence of thrombus in the main trunk of the pulmonary artery (PA) or  
9 the left or the right main PA. A peripheral PE was defined as thrombus in the lobar, segmental,  
10 or subsegmental PA. Signs of right ventricular (RV) strain were defined as the presence of one,  
11 or a combination of the following signs: 1) right-to-left ventricular ratio  $>0.9$ ; 2) pulmonary  
12 artery enlargement; 3) abnormal interventricular septum (flattening of septum or leftward septal  
13 bowing); and 4) inferior vena caval contrast reflux. Parameters including PE distribution (central  
14 vs distal), infarct location and burden, signs of RV strain, and other parenchymal abnormalities  
15 were collected. All available follow-up CT chest imaging up to 1-year post-discharge were  
16 reviewed by board-certified thoracic radiologists to determine the resolution of infarctions or  
17 residual abnormalities on available scans. All echocardiograms were reviewed, and data  
18 regarding left ventricular ejection fraction (LVEF), RV dilation, and RV dysfunction were  
19 collected.

#### 20 21 22 23 24 25 26 27 28 29 30 31 32 33 34 35 36 37 38 39 40 41 42 Statistical analysis

43  
44 All continuous variables were tested for normality and presented as mean with a standard  
45 deviation (SD), or median with an interquartile range (IQR) if distribution was skewed.

46  
47  
48  
49 Categorical variables were presented as absolute number (percentage). Comparisons between  
50 patients with and without infarction were performed using Student t-test or Mann-Whitney U for  
51 continuous variables, or Fischer's exact or  $X^2$  test for categorical variables, as appropriate.  
52  
53  
54  
55  
56  
57  
58  
59  
60

Univariable and multivariable logistic regression models were used to evaluate risk factors associated with pulmonary infarction. The software SPSS Statistics for Mac, version 26.0 (IBM Corp., Armonk, NY, USA) was used for statistical analysis. P-values of <0.05 (two-sided) were considered statistically significant.

## Results

### Patient characteristics

Out of 560 patients in the PERT registry, 62 cases were excluded due to diagnosis by other imaging modalities, and 2 cases were excluded after diagnosis of PE was ruled out. Hence, 496 patients were included in the study with a mean age of 58 years and 48% were female. Twenty-nine percent (143 of 496) of patients had evidence of pulmonary infarction on CTPA. Patients with pulmonary infarction were younger ( $52 \pm 15.9$  vs.  $61 \pm 16.6$  years,  $p < 0.001$ ) and with a significantly lower prevalence of comorbidities including cardiac disease (30% vs 42%,  $p = 0.014$ ), chronic kidney disease (CKD) (5% vs 42%,  $p = 0.018$ ), diabetes mellitus (17% vs 26%,  $p = 0.032$ ), hypothyroidism (4% vs 9%,  $p = 0.039$ ) and malignancy (16% vs 25%,  $p = 0.032$ ).

Although results did not reach statistical significance, chronic obstructive pulmonary disease (COPD) was less prevalent in the infarction group. Patients with infarction were more likely to present with pleuritic chest pain (32% vs 20%,  $p = 0.004$ ) and hemoptysis (8% vs 3%,  $p = 0.04$ ), while patients without infarction were more likely to present with syncope (6% vs 11%,  $p = 0.05$ ).

The baseline characteristics and symptoms of presentation of the study population are reported in

Table 1.

Table 1. Baseline characteristics and symptoms of presentation.

|                       | All (496)     | Without infarction (353) | With infarction (143) | P-value |
|-----------------------|---------------|--------------------------|-----------------------|---------|
| Gender (female)       | 238 (48%)     | 168 (48%)                | 70 (49%)              | 0.784   |
| Age, mean ( $\pm$ SD) | $58 \pm 16.9$ | $61 \pm 16.6$            | $52 \pm 15.9$         | <0.001  |

|                                 |                |                |                |       |
|---------------------------------|----------------|----------------|----------------|-------|
| Race, n (%)                     |                |                |                | 0.017 |
| Black                           | 249 (50%)      | 168 (48%)      | 81 (57%)       |       |
| White                           | 98 (20%)       | 81 (23%)       | 17 (12%)       |       |
| Other                           | 149 (30%)      | 104 (30%)      | 45 (32%)       |       |
| BMI, mean ( $\pm$ SD)           | 31.8 $\pm$ 9.3 | 31.8 $\pm$ 9.5 | 32.0 $\pm$ 8.7 | 0.421 |
| Symptoms at presentation, n (%) |                |                |                |       |
| Dyspnea                         | 297 (60%)      | 207 (59%)      | 90 (63%)       | 0.376 |
| Hypoxia                         | 237 (49%)      | 173 (50%)      | 64 (46%)       | 0.371 |
| Pleuritic chest pain            | 114 (23%)      | 69 (20%)       | 45 (32%)       | 0.004 |
| DVT symptoms                    | 50 (10%)       | 40 (11%)       | 10 (7%)        | 0.146 |
| Syncope                         | 48 (10%)       | 40 (11%)       | 8 (6%)         | 0.05  |
| Hemoptysis                      | 21 (4%)        | 9 (3%)         | 12 (8%)        | 0.04  |
| Altered mental status           | 38 (8%)        | 28 (8%)        | 10 (7%)        | 0.722 |
| Cardiac arrest                  | 22 (4%)        | 15 (4%)        | 7 (5%)         | 0.752 |
| Comorbidities, n (%)            |                |                |                |       |
| Cardiac diseases                | 191 (39%)      | 148 (42%)      | 43 (30%)       | 0.014 |
| COPD/asthma                     | 71 (14%)       | 54 (15%)       | 17 (12%)       | 0.326 |
| CKD                             | 49 (10%)       | 42 (12%)       | 7 (5%)         | 0.018 |
| Diabetes mellitus               | 115 (23%)      | 91 (26%)       | 24 (17%)       | 0.032 |
| Hypothyroidism                  | 36 (7%)        | 31 (9%)        | 5 (4%)         | 0.039 |
| Malignancy                      | 111 (22%)      | 88 (25%)       | 23 (16%)       | 0.032 |
| Recent surgery                  | 68 (14%)       | 52 (15%)       | 16 (11%)       | 0.299 |
| Current anticoagulation         | 59 (12%)       | 41 (12%)       | 18 (13%)       | 0.762 |

COPD= chronic obstructive pulmonary disease; CKD= chronic kidney disease; BMI= body mass index; DVT= deep vein thrombosis; SD= standard deviation.

### Risk stratification of PE

Troponin elevation ( $>0.1$ ng/ml) was less frequently observed in patients with infarction (39% vs 49%,  $p=0.031$ ). The presence of RV strain on CT was significantly higher in patients with infarction (58% vs 45%,  $p=0.009$ ), although no differences in signs of RV dilation or dysfunction on echocardiogram between infarction and non-infarction group were noted. There was no significant difference in sPESI risk group, BNP elevation, PE severity, or evidence of RV dysfunction on electrocardiography and echocardiogram between groups. Table 2 describes factors associated with PE severity.

Table 2. PE severity indices.

|  | All (496) | Without infarction (353) | With infarction (143) | P-value |
|--|-----------|--------------------------|-----------------------|---------|
|  |           |                          |                       |         |

|                              |           |           |          |       |
|------------------------------|-----------|-----------|----------|-------|
| sPESI score                  |           |           |          | 0.108 |
| Low risk (0 points)          | 89 (21%)  | 57 (19%)  | 32 (26%) |       |
| High risk ( $\geq 1$ points) | 327 (79%) | 238 (81%) | 89 (74%) |       |
| Elevated BNP                 | 242 (54%) | 169 (53%) | 73 (55%) | 0.629 |
| Elevated troponin            | 228 (46%) | 173 (49%) | 55 (39%) | 0.031 |
| Evidence of RV strain on EKG | 77 (16%)  | 48 (14%)  | 29 (21%) | 0.137 |
| PE severity                  |           |           |          |       |
| Low risk                     | 132 (27%) | 93 (26%)  | 39 (27%) | 0.994 |
| Intermediate low risk        | 173 (35%) | 124 (35%) | 49 (34%) |       |
| Intermediate high risk       | 144 (29%) | 103 (29%) | 41 (29%) |       |
| High risk                    | 47 (10%)  | 33 (9%)   | 14 (10%) |       |
| EKG evidence of RV strain    | 77 (16%)  | 48 (14%)  | 29 (21%) | 0.137 |
| CT evidence of RV strain     | 242 (49%) | 159 (45%) | 83 (58%) | 0.009 |
| Echocardiogram               |           |           |          |       |
| RV dilation                  | 251 (54%) | 173 (52%) | 78 (57%) | 0.302 |
| RV dysfunction               | 235 (50%) | 162 (49%) | 73 (54%) | 0.338 |
| LVEF                         | 38 (8%)   | 23 (7%)   | 15 (11%) | 0.306 |
| LE DVT                       | 227 (50%) | 161 (51%) | 66 (50%) | 0.928 |
| UE DVT                       | 39 (22%)  | 27 (22%)  | 12 (21%) | 0.916 |

BNP= B-type natriuretic peptide; CT= computed tomography; DVT= deep vein thrombosis; EKG= electrocardiography; LE= lower extremity; LVEF= left ventricular ejection fraction; sPESI= simplified pulmonary embolism severity index; RV= right ventricular; LVEF= left ventricular ejection fraction; PE= pulmonary embolism; UE= upper extremity

Radiographic characteristics

There was no difference in PE distribution and clot burden between groups and 50% of patients with infarction had thrombus located at the main PAs including those who had saddle PE. Most infarctions occurred in the lower lobe (60%) and involved a single lobe (64%). Patients with infarction were more likely to have parenchymal abnormalities including consolidation (21% vs 12%,  $p= 0.007$ ), pulmonary edema (13% vs 7%,  $p= 0.036$ ), pleural effusion (33% vs 24%,  $p=0.038$ ) and ground glass opacity (20% vs 13%,  $p= 0.042$ ). Table 3a demonstrates the radiographic characteristics of patients with acute PE. Table 3b demonstrates the radiographic characteristics of pulmonary infarction. Fifty-eight (41%) patients had follow-up CT-chest imaging for a variety of reasons performed up to 1-year post-discharge. Resolution of pulmonary infarction was observed in 53% (17 out of 32), 85% (12 out of 14), and 92% (11 out of 12) of patients who had imaging at 3-month, 6-month, and 1-year intervals.

Table 3a. Radiographic characteristics of patients with acute pulmonary embolism.

|                           | All (496) | Without infarction (353) | With infarction (143) | P-value |
|---------------------------|-----------|--------------------------|-----------------------|---------|
| RV strain on CT           | 242 (49%) | 159 (45%)                | 83 (58%)              | 0.009   |
| RV to LV ratio $\geq 1$   | 155 (31%) | 106 (30%)                | 49 (34%)              | 0.640   |
| Dilated PA                | 99 (20%)  | 59 (17%)                 | 40 (28%)              | 0.011   |
| Septal position           |           |                          |                       | 0.030   |
| Rightward bowing          | 131 (27%) | 102 (29%)                | 29 (20%)              |         |
| Flattened                 | 112 (23%) | 66 (19%)                 | 46 (32%)              |         |
| Leftward bowing           | 50 (10%)  | 32 (9%)                  | 18 (13%)              |         |
| PE distribution           |           |                          |                       | 0.052   |
| Central PE                | 216 (44%) | 144 (41%)                | 72 (50%)              |         |
| Distal PE                 | 280 (57%) | 209 (59%)                | 71 (50%)              |         |
| Clot burden               |           |                          |                       | 0.200   |
| Main, saddle or proximal  | 215 (43%) | 143 (41%)                | 72 (50%)              |         |
| Interlobar to lobar       | 124 (25%) | 94 (27%)                 | 30 (21%)              |         |
| Segmental                 | 150 (30%) | 110 (31%)                | 40 (28%)              |         |
| Subsegmental              | 7 (1%)    | 6 (2%)                   | 1 (1%)                |         |
| Parenchymal abnormalities |           |                          |                       |         |
| Pulmonary edema           | 42 (9%)   | 24 (7%)                  | 18 (13%)              | 0.036   |
| Consolidation             | 71 (14%)  | 41 (12%)                 | 30 (21%)              | 0.007   |
| Emphysema                 | 65 (13%)  | 48 (14%)                 | 16 (11%)              | 0.469   |
| Fibrosis                  | 42 (9%)   | 30 (9%)                  | 12 (8%)               | 0.969   |
| Pleural effusion          | 128 (26%) | 84 (24%)                 | 47 (33%)              | 0.038   |
| Atelectasis               | 161 (33%) | 113 (32%)                | 48 (34%)              | 0.738   |
| Ground glass opacity      | 72 (15%)  | 44 (13%)                 | 28 (20%)              | 0.042   |

CT= computed tomography; LV= left ventricular; RV= right ventricular; PA= pulmonary artery; PE= pulmonary embolism

Table 3b. Radiographic characteristics of pulmonary infarction.

|                  | Infarcts, number (%) |
|------------------|----------------------|
| Infarct location |                      |
| Upper lobe       | 31 (22%)             |
| Middle lobe      | 8 (6%)               |
| Lower lobe       | 86 (60%)             |
| Multiple         | 18 (12%)             |
| Infarct burden   |                      |
| Single lobe      | 91 (64%)             |
| Multiple lobes   | 52 (36%)             |

Treatment and outcomes

1  
2  
3 There was no significant difference in the number of patients receiving advanced reperfusion  
4 therapy between groups. Most patients with pulmonary infarction received anticoagulation alone  
5 (69%), followed by catheter-directed thrombolysis (12%), and systemic thrombolysis (11%).  
6  
7

8  
9  
10 There were more patients with infarction who received antimicrobial therapy compared to those  
11 without infarction (15% vs 5%,  $p < 0.001$ ). Among the 47 patients who had concomitant  
12 infarction and pleural effusion, six patients (13%) underwent diagnostic and/or therapeutic  
13 thoracentesis and five had an exudative pleural effusion. Patients with infarction were less  
14 likely to require oxygen on discharge (11% vs 19%,  $p = 0.031$ ), and those who required oxygen  
15 on discharge were more likely to have multiple lobe infarctions than single lobe infarction (19%  
16 vs 7%,  $p = 0.032$ ). There was no significant difference between patients with infarction and  
17 without infarction regarding length of stay ( $10.7 \pm 14.7$  vs  $9.5 \pm 12.3$ ,  $p = 0.698$ ), in-hospital death  
18 (7% vs 8%,  $p = 0.801$ ), disposition (home: 78% vs 75%,  $p = 0.759$ ), bleeding complications (24%  
19 vs 12%,  $p = 0.089$ ) and readmission within 30 days (18% vs 16%,  $p = 0.584$ ) (Supplemental  
20 material online, table 1).  
21  
22  
23  
24  
25  
26  
27  
28  
29  
30  
31  
32  
33  
34

35 Patients with infarction who underwent CDT had a longer length of stay ( $15 \pm 24.4$  vs  $7 \pm 8.4$ ,  
36  $p = 0.044$ ) and a higher rate of readmission within 30 days (18% vs 2%,  $p = 0.047$ ), compared to  
37 those without infarction. Readmission diagnoses of patients with infarction who underwent CDT  
38 were as follows: one patient developed vaginal bleeding from anticoagulant use, one patient  
39 developed acute hypoxic respiratory failure due to multifocal pneumonia, and one patient was  
40 admitted for chest pain. There was no significant difference in in-hospital mortality (6% vs 6%,  
41  $p = 0.973$ ) and complications including minor and major bleeding (24% vs 21%,  $p = 0.676$ ), access  
42 site hematoma (13% vs 2%,  $p = 0.134$ ) and need for transfusion (18% vs 13%,  $p = 0.649$ ) between  
43 those with and without infarction (Supplemental material online, table 2).  
44  
45  
46  
47  
48  
49  
50  
51  
52  
53  
54  
55  
56  
57  
58  
59  
60



In univariable regression analyses, we identified several factors independently associated with pulmonary infarction. These included age, history of cardiac diseases, malignancy, hypothyroidism, diabetes mellitus, CKD, elevated troponin, pleuritic chest pain, hemoptysis, and RV strain on CT. A multivariable regression analysis was subsequently performed, and four factors remained significant: Both hemoptysis (OR, 3.034; 95% CI, 1.162-7.924) and presence of RV strain on CT (OR, 2.142; 95% CI 1.365-3.360) significantly increased the risk of infarction, while age (OR, 0.973, 95% CI, 0.959-0.987) and presence of elevated troponin (OR, 0.629; 95% CI 0.398-0.993) decreased risk (Table 4).

Table 4. Univariate and multivariate analysis of potential risk factors.

| Variables         | Variables                |                       | Univariate analysis |         |             | Multivariate analysis |         |             |
|-------------------|--------------------------|-----------------------|---------------------|---------|-------------|-----------------------|---------|-------------|
|                   | Without infarction (353) | With infarction (143) | Odds ratio          | P-value | 95% CI      | Odds ratio            | P-value | 95% CI      |
| Age, years        | 61 ± 16.6                | 52 ± 15.9             | 0.968               | <0.001  | 0.956-0.980 | 0.973                 | <0.001  | 0.959-0.987 |
| Cardiac diseases  | 148 (42%)                | 43 (30%)              | 0.596               | 0.014   | 0.393-0.902 |                       |         |             |
| CKD               | 42 (12%)                 | 7 (5%)                | 0.381               | 0.022   | 0.167-0.870 |                       |         |             |
| DM                | 91 (26%)                 | 24 (17%)              | 0.581               | 0.033   | 0.352-0.957 |                       |         |             |
| Malignancy        | 88 (25%)                 | 23 (16%)              | 0.577               | 0.034   | 0.348-0.958 |                       |         |             |
| Hypothyroidism    | 31 (9%)                  | 5 (4%)                | 0.375               | 0.047   | 0.143-0.985 |                       |         |             |
| Elevated troponin | 173 (49%)                | 55 (39%)              | 0.647               | 0.032   | 0.435-0.962 | 0.629                 | 0.047   | 0.398-0.993 |
| Pleuritic CP      | 69 (20%)                 | 45 (32%)              | 1.890               | 0.005   | 1.217-2.935 |                       |         |             |
| Hemoptysis        | 9 (3%)                   | 12 (8%)               | 3.491               | 0.006   | 1.437-8.479 | 3.034                 | 0.023   | 1.162-7.924 |
| RV strain on CT   | 159 (45%)                | 83 (58%)              | 1.688               | 0.009   | 1.140-2.500 | 2.142                 | <0.001  | 1.365-3.360 |

CP= chest pain; CKD= chronic kidney disease; CT= computed tomography DM= diabetes mellites; RV= right ventricular

## Discussion

In this study, the estimated prevalence of pulmonary infarction was 29%. Patients with infarction were more likely to present with pleuritic chest pain and hemoptysis. Additionally, those with pulmonary infarction were younger and had a lower prevalence of comorbidities. While the presence of RV strain on CT imaging was more common in patients with pulmonary infarction, the rate of reperfusion therapies, complications, and outcomes was similar in both groups. The presence of hemoptysis and RV strain on CT significantly increased the risk of infarction, whereas age and elevated troponin decreased the risk. Pulmonary infarction resolved in the

1  
2  
3 majority of patients for whom follow-up imaging was available, which is in concordance with  
4  
5 newer studies (8, 9, 13).  
6

7  
8 The prevalence of pulmonary infarction in our cohort is in keeping with previously reported rates  
9  
10 ranging from 9% to 36% (3, 13). Regarding clinical presentation, the higher presence of pleuritic  
11  
12 chest pain and hemoptysis in patients with infarction likely represents a result of alveolar  
13  
14 hemorrhage, leading to pleural inflammation, irritation, and necrosis. In addition, the presence of  
15  
16 pleural effusion was more prevalent in patients with infarction due to pleural inflammation  
17  
18 following infarction, however, most of these effusions were not intervened upon and had  
19  
20 resolved on follow-up imaging. Although patients with infarction were more likely to present  
21  
22 with pleuritic chest pain and hemoptysis, these symptoms were only present in 32% and 8% of  
23  
24 patients with infarction respectively. Thus, the majority did not have these symptoms may not be  
25  
26 useful in identifying pulmonary infarction. Interestingly, patients with pulmonary infarction were  
27  
28 more likely to be treated with antimicrobial therapy than those without. One possible explanation  
29  
30 is that other lung processes, such as pneumonia, pulmonary edema, or atelectasis can produce  
31  
32 consolidative changes similar to infarction on CT imaging (14), and as a result, pneumonia  
33  
34 cannot be excluded especially when combined with a clinically compatible presentation.  
35  
36 In our study, patients with infarction were significantly younger and with fewer comorbid  
37  
38 conditions, specifically a lower prevalence of cardiac disease and malignancy that have  
39  
40 traditionally been regarded as major risk factors for infarction. This discrepancy may be due to a  
41  
42 lack of efficient collateral circulation to lung tissues, which presumably develops in the setting of  
43  
44 longstanding local tissue hypoxia (8, 15), and is unlikely to happen in otherwise healthy, young  
45  
46 individuals in the absence of cardiopulmonary diseases.  
47  
48  
49  
50  
51  
52  
53  
54  
55  
56  
57  
58  
59  
60

1  
2  
3 Our cohort also found that patients with infarction did have higher rates of RV strain, dilated PA,  
4 and flattened or leftward bowing of the interventricular septum, although signs of RV strain were  
5 not reproducible on echocardiography. A potential explanation for this finding is that patients  
6 with infarction were younger with less comorbid diseases, thus without pre-existing RV  
7 hypertrophy allowing for tolerance of acute RV afterload elevation. This may also explain our  
8 finding that troponin elevation was less likely to be observed in patients with infarction. While  
9 troponin elevation is indicative of RV strain, RV myocardium might not necessarily be its only  
10 source (16). A mismatch between oxygen demand and supply (demand ischemia) and a decrease  
11 in renal clearance could contribute to the higher rates of troponin elevation observed in patients  
12 without infarction, as evidenced by their higher prevalence of comorbidities.  
13  
14

15  
16  
17 Regarding the discrepancy between CT and echocardiographic findings, unlike CTPA which is  
18 often the first diagnostic and confirmatory modality for PE, most echocardiography is performed  
19 after the initial diagnosis and potentially after reperfusion therapy. In our study, the mean and  
20 median time lapse between the availability of CT results to echocardiogram results was 29 hours  
21 40 minutes and 20 hours 11 minutes respectively. Thus, it is possible that the initial signs of RV  
22 strain shown on CTPA could have improved or resolved through several potential mechanisms;  
23 administration of supplemental oxygen leading to a reversal of hypoxic vasoconstriction, clot  
24 burden reduction using reperfusion therapy, or intrinsic thrombolytic activity with  
25 anticoagulation support alone.  
26  
27

28  
29  
30 Importantly, we demonstrated no differences in complication rates and in-hospital mortality in  
31 patients who underwent CDT with pulmonary infarction compared to those without, although  
32 patients with infarction had a longer length of stay and a higher rate of 30-day readmission for  
33 non-PE or CDT-related diagnoses. There remains a theoretical risk of increased bleeding  
34  
35  
36  
37  
38  
39  
40  
41  
42  
43  
44  
45  
46  
47  
48  
49  
50  
51  
52  
53  
54  
55  
56  
57  
58  
59  
60

1  
2  
3 complications in the area of pulmonary infarction during catheter manipulation and local  
4 installation of thrombolytics, however, this was not demonstrated in our cohort.  
5  
6

### 7 Study Limitations

8  
9  
10 To the best of our knowledge, this study represented the largest cohort of patients with acute PE  
11 complicated by pulmonary infarction, however, there are several limitations in our study. Cases  
12 of pulmonary infarction were identified based on CT findings and there was no histological  
13 correlation to differentiate between true necrosis versus alveolar hemorrhage. Patients with  
14 conditions that led to pulmonary hypertension could have pre-existing parenchymal changes that  
15 resemble acute RV strain caused by PE. In those scenarios, it would be technically difficult to  
16 differentiate whether these CT features are related to pre-existing pulmonary hypertension itself,  
17 or the combination. Owing to the retrospective nature of this study, not all patients underwent  
18 CT imaging post-discharge, thus we were unable to comment on the precise timing of the  
19 resolution of pulmonary infarction. We acknowledge the fact that not all patients in our cohort  
20 had echocardiography, in particular, patients with low-risk PE when echocardiography was not  
21 deemed necessary to change management or patients with high-risk PE who expired prior to the  
22 completion of echocardiography. Other limitations included the retrospective, single-center  
23 nature of the data, which may be prone to selection bias.  
24  
25  
26  
27  
28  
29  
30  
31  
32  
33  
34  
35  
36  
37  
38  
39  
40  
41

42 In conclusion, pulmonary infarction was demonstrated on CT in nearly one-third of acute PE,  
43 and patients with infarction were younger, with fewer comorbidities, and more likely to present  
44 with pleuritic chest pain and hemoptysis. Overall, there was no difference in length of stay, in-  
45 hospital death, bleeding complication, and readmission rate between patients with and without  
46 infarction, and patients with infarction were less likely to require oxygen on discharge. The  
47 presence of pulmonary infarction did not correlate with poorer outcomes and should not be  
48  
49  
50  
51  
52  
53  
54  
55  
56  
57  
58  
59  
60

1  
2  
3 considered a supporting factor nor a contraindication for advanced reperfusion therapy for PE.

4  
5 **Author contributions:** KUL is the primary author, collected and analyzed the data, and is the  
6  
7 guarantor of the article, taking responsibility for the integrity of the work as a whole from  
8  
9 inception to the published article. OO and PR are responsible for the study concept and helped  
10  
11 write the manuscript. RB, GC, VL, and JP reviewed the imaging studies and treated the patients  
12  
13 who underwent catheter-directed thrombolysis. SB and BRL helped write the manuscript.  
14

15  
16  
17 **Conflict of interest:** There are no financial or other conflicts of interest to disclose.  
18

19  
20 **Ethics approval:** This study was approved by the Institutional Review Board (Protocol #26021)  
21  
22 at Temple University Hospital and informed consent was waived due to the retrospective nature  
23  
24 of the study.  
25

26  
27 **Patient consent for publication:** Not required.

28  
29 **Funding statement:** This study received no funding.

30  
31 **Data sharing statement:** All data relevant to the study are included in the article or uploaded as  
32  
33 supplementary information.  
34  
35  
36  
37  
38  
39  
40  
41  
42  
43  
44  
45  
46  
47  
48  
49  
50  
51  
52  
53  
54  
55  
56  
57  
58  
59  
60

## Reference

1. Barco S, Valerio L, Ageno W, Cohen AT, Goldhaber SZ, Hunt BJ, Iorio A, Jimenez D, Klok FA, Kucher N, Mahmoudpour SH, Middeldorp S, Münzel T, Tagalakis V, Wendelboe AM, Konstantinides SV. Age-sex specific pulmonary embolism-related mortality in the USA and Canada, 2000–18: an analysis of the WHO Mortality Database and of the CDC Multiple Cause of Death database. *The Lancet Respiratory Medicine* 2021; 9: 33-42.
2. Raskob GE, Angchaisuksiri P, Blanco AN, Buller H, Gallus A, Hunt BJ, Hylek EM, Kakkar A, Konstantinides SV, McCumber M, Ozaki Y, Wendelboe A, Weitz JI. Thrombosis: a major contributor to global disease burden. *Arterioscler Thromb Vasc Biol* 2014; 34: 2363-2371.
3. Heyer CM, Lemburg SP, Knoop H, Holland-Letz T, Nicolas V, Roggenland D. Multidetector-CT angiography in pulmonary embolism—can image parameters predict clinical outcome? *European Radiology* 2011; 21: 1928-1937.
4. Osiro S, Wear C, Hudson R, Ma XX, Zurada A, Michalak M, Loukas M. A friend to the airways: a review of the emerging clinical importance of the bronchial arterial circulation. *Surg Radiol Anat* 2012; 34: 791-798.
5. Pump KK. The bronchial arteries and their anastomoses in the human lung. *Dis Chest* 1963; 43: 245-255.
6. Hampton AO, Castleman BL. Correlation of postmortem chest teleroentgenograms with autopsy findings with special reference to pulmonary embolism and infarction. 1940.
7. Tsao MS, Schraufnagel D, Wang NS. Pathogenesis of pulmonary infarction. *Am J Med* 1982; 72: 599-606.
8. Islam M, Filopei J, Frank M, Ramesh N, Verzosa S, Ehrlich M, Bondarsky E, Miller A, Steiger D. Pulmonary infarction secondary to pulmonary embolism: An evolving paradigm. *Respirology* 2018.
9. Miniati M, Bottai M, Ciccotosto C, Roberto L, Monti S. Predictors of Pulmonary Infarction. *Medicine (Baltimore)* 2015; 94: e1488.
10. Konstantinides SV, Meyer G, Becattini C, Bueno H, Geersing GJ, Harjola VP, Huisman MV, Humbert M, Jennings CS, Jiménez D, Kucher N, Lang IM, Lankeit M, Lorusso R, Mazzolai L, Meneveau N, F NÁ, Prandoni P, Pruszczyk P, Righini M, Torbicki A, Van Belle E, Zamorano JL. 2019 ESC Guidelines for the diagnosis and management of acute pulmonary embolism developed in collaboration with the European Respiratory Society (ERS). *Eur Heart J* 2020; 41: 543-603.
11. Schulman S, Kearon C. Definition of major bleeding in clinical investigations of antithrombotic medicinal products in non-surgical patients. *J Thromb Haemost* 2005; 3: 692-694.
12. Revel M-P, Triki R, Chatellier G, Couchon S, Haddad N, Hernigou A, Danel C, Frija G. Is It Possible to Recognize Pulmonary Infarction on Multisection CT Images? *Radiology* 2007; 244: 875-882.
13. Cha S-I, Shin K-M, Lee J, Hwangbo Y, Yoo S-S, Lee J, Lee S-Y, Kim C-H, Park J-Y, Jung T-H. Clinical relevance of pulmonary infarction in patients with pulmonary embolism. *Thrombosis Research* 2012; 130: e1-e5.

- 1  
2  
3 14. Ren H, Kuhlman JE, Hruban RH, Fishman EK, Wheeler PS, Hutchins GM. CT of inflation-fixed  
4 lungs: wedge-shaped density and vascular sign in the diagnosis of infarction. *J Comput*  
5 *Assist Tomogr* 1990; 14: 82-86.  
6  
7 15. Malik AB, Tracy SE. Bronchovascular adjustments after pulmonary embolism. *Journal of*  
8 *Applied Physiology* 1980; 49: 476-481.  
9  
10 16. Becattini C, Vedovati MC, Agnelli G. Prognostic value of troponins in acute pulmonary  
11 embolism: a meta-analysis. *Circulation* 2007; 116: 427-433.  
12  
13  
14  
15  
16  
17  
18  
19  
20  
21  
22  
23  
24  
25  
26  
27  
28  
29  
30  
31  
32  
33  
34  
35  
36  
37  
38  
39  
40  
41  
42  
43  
44  
45  
46  
47  
48  
49  
50  
51  
52  
53  
54  
55  
56  
57  
58  
59  
60

1  
2  
3  
4  
5  
6  
7  
8  
9  
10  
11  
12  
13  
14  
15  
16  
17  
18  
19  
20  
21  
22  
23  
24  
25  
26  
27  
28  
29  
30  
31  
32  
33  
34  
35  
36  
37  
38  
39  
40  
41  
42  
43  
44  
45  
46  
47  
48  
49  
50  
51  
52  
53  
54  
55  
56  
57  
58  
59  
60

Figure 1. Patient selection flow diagram.

For peer review only





Figure 1. Patient selection flow diagram.

32x19mm (800 x 800 DPI)

Supplemental material, table 1. Treatment and outcomes between patients with and without infarction.

|                            | All (496)  | Without infarction (353) | With infarction (143) | P-value |
|----------------------------|------------|--------------------------|-----------------------|---------|
| Anticoagulation alone      | 357 (72%)  | 259 (73%)                | 98 (69%)              | 0.545   |
| CDT                        | 70 (14%)   | 53 (15%)                 | 17 (12%)              | 0.365   |
| Thrombolysis               |            |                          |                       | 0.212   |
| Half dose                  | 25 (5%)    | 15 (4%)                  | 10 (7%)               |         |
| Full dose                  | 14 (3%)    | 8 (2%)                   | 6 (4%)                |         |
| Mechanical thrombectomy    | 19 (4%)    | 10 (3%)                  | 9 (6%)                | 0.069   |
| Surgical thrombectomy      | 9 (2%)     | 6 (2%)                   | 3 (2%)                | 0.763   |
| ECMO                       | 11 (2%)    | 6 (2%)                   | 5 (4%)                | 0.218   |
| Mechanical ventilation     | 48 (10%)   | 30 (9%)                  | 18 (13%)              | 0.163   |
| Antimicrobials             | 39 (8%)    | 19 (5%)                  | 22 (15%)              | <0.001  |
| In-hospital death          | 37 (8%)    | 27 (8%)                  | 10 (7%)               | 0.801   |
| Disposition                |            |                          |                       | 0.759   |
| Home                       | 349 (76%)  | 245 (75%)                | 104 (78%)             |         |
| ECF                        | 100 (22%)  | 74 (23%)                 | 26 (20%)              |         |
| Hospice                    | 10 (2%)    | 7 (2%)                   | 3 (2%)                |         |
| Length of stay, days       | 10±13.0    | 9.5±12.3                 | 10.7±14.7             | 0.698   |
| Bleeding complication      |            |                          |                       | 0.089   |
| Minor bleeding             | 31 (6%)    | 25 (7%)                  | 6 (4%)                |         |
| Major bleeding             | 32 (7%)    | 18 (5%)                  | 14 (10%)              |         |
| Need for transfusion       | 63 (13%)   | 41 (12%)                 | 22 (16%)              | 0.253   |
| Readmission within 30 days | 76 (16.6%) | 52 (16%)                 | 24 (18%)              | 0.584   |
| New O2 on discharge        | 75 (16%)   | 61 (19%)                 | 14 (11%)              | 0.031   |
| Pulmonary follow-up        | 199 (42%)  | 144 (44%)                | 55 (40%)              | 0.610   |

CDT= catheter-directed thrombolysis; ECMO= extracorporeal membrane oxygenation;  
ECF= extended care facility

Supplemental material, table 2. Outcomes and complication rates in CDT.

|                            | All (70) | Without infarction (53) | With infarction (17) | P-value |
|----------------------------|----------|-------------------------|----------------------|---------|
| In-hospital death          | 4 (6%)   | 3 (6%)                  | 1 (6%)               | 0.973   |
| Disposition                |          |                         |                      | 0.436   |
| Home                       | 57 (86%) | 42 (84%)                | 15 (94%)             |         |
| ECF                        | 9 (14%)  | 8 (16%)                 | 1 (7%)               |         |
| Length of Stay             | 9±14.2   | 7±8.4                   | 15±24.4              | 0.044   |
| Readmission within 30 days | 4 (6%)   | 1 (2%)                  | 3 (18%)              | 0.047   |
| New O2 on discharge        | 10 (16%) | 8 (17%)                 | 2 (12%)              | 0.609   |
| Pulmonary follow-up        | 47 (72%) | 38 (76%)                | 9 (56%)              | 0.166   |
| <b>Complications</b>       |          |                         |                      |         |
| Bleeding                   |          |                         |                      | 0.676   |
| Minor                      | 10 (14%) | 8 (15%)                 | 2 (12%)              |         |
| Major                      | 5 (7%)   | 3 (6%)                  | 2 (12%)              |         |
| RBC transfusion            | 10 (14%) | 7 (13%)                 | 3 (18%)              | 0.649   |
| Access site hematoma       | 3 (5%)   | 1 (2%)                  | 2 (13%)              | 0.134   |

ECF= extended care facility; RBC= red blood cell

1  
2  
3  
4  
5  
6  
7  
8  
9  
10  
11  
12  
13  
14  
15  
16  
17  
18  
19  
20  
21  
22  
23  
24  
25  
26  
27  
28  
29  
30  
31  
32  
33  
34  
35  
36  
37  
38  
39  
40  
41  
42  
43  
44  
45  
46  
47  
48  
49  
50  
51  
52  
53  
54  
55  
56  
57  
58  
59  
60

For peer review only

**The RECORD statement – checklist of items, extended from the STROBE statement, that should be reported in observational studies using routinely collected health data.**

|                           | Item No. | STROBE items                                                                                                                                                                               | Location in manuscript where items are reported | RECORD items                                                                                                                                                                                                                                                                                                                                                                                                                                | Location in manuscript where items are reported |
|---------------------------|----------|--------------------------------------------------------------------------------------------------------------------------------------------------------------------------------------------|-------------------------------------------------|---------------------------------------------------------------------------------------------------------------------------------------------------------------------------------------------------------------------------------------------------------------------------------------------------------------------------------------------------------------------------------------------------------------------------------------------|-------------------------------------------------|
| <b>Title and abstract</b> |          |                                                                                                                                                                                            |                                                 |                                                                                                                                                                                                                                                                                                                                                                                                                                             |                                                 |
|                           | 1        | (a) Indicate the study's design with a commonly used term in the title or the abstract (b) Provide in the abstract an informative and balanced summary of what was done and what was found | (a) Page 2, line 3-4<br>(b) Page 4              | RECORD 1.1: The type of data used should be specified in the title or abstract. When possible, the name of the databases used should be included.<br><br>RECORD 1.2: If applicable, the geographic region and timeframe within which the study took place should be reported in the title or abstract.<br><br>RECORD 1.3: If linkage between databases was conducted for the study, this should be clearly stated in the title or abstract. | 1.1: Page 2, line 3-4<br>1.2: Page 2, line 3-4  |
| <b>Introduction</b>       |          |                                                                                                                                                                                            |                                                 |                                                                                                                                                                                                                                                                                                                                                                                                                                             |                                                 |
| Background rationale      | 2        | Explain the scientific background and rationale for the investigation being reported                                                                                                       | Page 6, line 5-35                               |                                                                                                                                                                                                                                                                                                                                                                                                                                             |                                                 |
| Objectives                | 3        | State specific objectives, including any prespecified hypotheses                                                                                                                           | Page 6, line 36-40                              |                                                                                                                                                                                                                                                                                                                                                                                                                                             |                                                 |
| <b>Methods</b>            |          |                                                                                                                                                                                            |                                                 |                                                                                                                                                                                                                                                                                                                                                                                                                                             |                                                 |
| Study Design              | 4        | Present key elements of study design early in the paper                                                                                                                                    | Page 6                                          |                                                                                                                                                                                                                                                                                                                                                                                                                                             |                                                 |
| Setting                   | 5        | Describe the setting, locations, and relevant dates, including periods of recruitment, exposure, follow-up, and data collection                                                            | Page 6, line 47- page 7, line 10                |                                                                                                                                                                                                                                                                                                                                                                                                                                             |                                                 |

|                                                                                                                                                                                                            |          |                                                                                                                                                                                                                                                                                                                                                                                                                                                                                                                                                                                                                                                                                                                        |                                         |                                                                                                                                                                                                                                                                                                                                                                                                                                                                                                                                                                                                                                                                                                      |                                                                                              |
|------------------------------------------------------------------------------------------------------------------------------------------------------------------------------------------------------------|----------|------------------------------------------------------------------------------------------------------------------------------------------------------------------------------------------------------------------------------------------------------------------------------------------------------------------------------------------------------------------------------------------------------------------------------------------------------------------------------------------------------------------------------------------------------------------------------------------------------------------------------------------------------------------------------------------------------------------------|-----------------------------------------|------------------------------------------------------------------------------------------------------------------------------------------------------------------------------------------------------------------------------------------------------------------------------------------------------------------------------------------------------------------------------------------------------------------------------------------------------------------------------------------------------------------------------------------------------------------------------------------------------------------------------------------------------------------------------------------------------|----------------------------------------------------------------------------------------------|
| <p>1<br/>2<br/>3<br/>4<br/>5<br/>6<br/>7<br/>8<br/>9<br/>10<br/>11<br/>12<br/>13<br/>14<br/>15<br/>16<br/>17<br/>18<br/>19<br/>20<br/>21<br/>22<br/>23<br/>24<br/>25<br/>26<br/>27</p> <p>Participants</p> | <p>6</p> | <p>(a) <i>Cohort study</i> - Give the eligibility criteria, and the sources and methods of selection of participants. Describe methods of follow-up<br/> <i>Case-control study</i> - Give the eligibility criteria, and the sources and methods of case ascertainment and control selection. Give the rationale for the choice of cases and controls<br/> <i>Cross-sectional study</i> - Give the eligibility criteria, and the sources and methods of selection of participants</p> <p>(b) <i>Cohort study</i> - For matched studies, give matching criteria and number of exposed and unexposed<br/> <i>Case-control study</i> - For matched studies, give matching criteria and the number of controls per case</p> | <p>Page 6, line 47- page 7, line 10</p> | <p>RECORD 6.1: The methods of study population selection (such as codes or algorithms used to identify subjects) should be listed in detail. If this is not possible, an explanation should be provided.</p> <p>RECORD 6.2: Any validation studies of the codes or algorithms used to select the population should be referenced. If validation was conducted for this study and not published elsewhere, detailed methods and results should be provided.</p> <p>RECORD 6.3: If the study involved linkage of databases, consider use of a flow diagram or other graphical display to demonstrate the data linkage process, including the number of individuals with linked data at each stage.</p> | <p>6.1: Page 6, line 47- page 7, line 10</p> <p>6.2: not applicable</p> <p>6.3: figure 1</p> |
| <p>28<br/>29<br/>30<br/>31<br/>32<br/>33<br/>34</p> <p>Variables</p>                                                                                                                                       | <p>7</p> | <p>Clearly define all outcomes, exposures, predictors, potential confounders, and effect modifiers. Give diagnostic criteria, if applicable.</p>                                                                                                                                                                                                                                                                                                                                                                                                                                                                                                                                                                       | <p>Page 7</p>                           | <p>RECORD 7.1: A complete list of codes and algorithms used to classify exposures, outcomes, confounders, and effect modifiers should be provided. If these cannot be reported, an explanation should be provided.</p>                                                                                                                                                                                                                                                                                                                                                                                                                                                                               | <p>Page 7</p>                                                                                |
| <p>35<br/>36<br/>37<br/>38<br/>39<br/>40<br/>41<br/>42</p> <p>Data sources/<br/>measurement</p>                                                                                                            | <p>8</p> | <p>For each variable of interest, give sources of data and details of methods of assessment (measurement). Describe comparability of assessment methods if there is more than one group</p>                                                                                                                                                                                                                                                                                                                                                                                                                                                                                                                            | <p>Page 7</p>                           |                                                                                                                                                                                                                                                                                                                                                                                                                                                                                                                                                                                                                                                                                                      |                                                                                              |

|                                                                                                                                                                                                                                                                               |                                  |    |                                                                                                                                                                                                                                                                                                                                                                                                                                                                                                                                                                      |                    |                                                                                                                                                       |                                     |
|-------------------------------------------------------------------------------------------------------------------------------------------------------------------------------------------------------------------------------------------------------------------------------|----------------------------------|----|----------------------------------------------------------------------------------------------------------------------------------------------------------------------------------------------------------------------------------------------------------------------------------------------------------------------------------------------------------------------------------------------------------------------------------------------------------------------------------------------------------------------------------------------------------------------|--------------------|-------------------------------------------------------------------------------------------------------------------------------------------------------|-------------------------------------|
| 1<br>2<br>3<br>4<br>5<br>6<br>7<br>8<br>9<br>10<br>11<br>12<br>13<br>14<br>15<br>16<br>17<br>18<br>19<br>20<br>21<br>22<br>23<br>24<br>25<br>26<br>27<br>28<br>29<br>30<br>31<br>32<br>33<br>34<br>35<br>36<br>37<br>38<br>39<br>40<br>41<br>42<br>43<br>44<br>45<br>46<br>47 | Bias                             | 9  | Describe any efforts to address potential sources of bias                                                                                                                                                                                                                                                                                                                                                                                                                                                                                                            | Page 8, line 3-4   |                                                                                                                                                       |                                     |
|                                                                                                                                                                                                                                                                               | Study size                       | 10 | Explain how the study size was arrived at                                                                                                                                                                                                                                                                                                                                                                                                                                                                                                                            | Page 9, line 5-10  |                                                                                                                                                       |                                     |
|                                                                                                                                                                                                                                                                               | Quantitative variables           | 11 | Explain how quantitative variables were handled in the analyses. If applicable, describe which groupings were chosen, and why                                                                                                                                                                                                                                                                                                                                                                                                                                        | Page 7, line 17-54 |                                                                                                                                                       |                                     |
|                                                                                                                                                                                                                                                                               | Statistical methods              | 12 | (a) Describe all statistical methods, including those used to control for confounding<br>(b) Describe any methods used to examine subgroups and interactions<br>(c) Explain how missing data were addressed<br>(d) <i>Cohort study</i> - If applicable, explain how loss to follow-up was addressed<br><i>Case-control study</i> - If applicable, explain how matching of cases and controls was addressed<br><i>Cross-sectional study</i> - If applicable, describe analytical methods taking account of sampling strategy<br>(e) Describe any sensitivity analyses | Page 8, line 33-51 |                                                                                                                                                       |                                     |
|                                                                                                                                                                                                                                                                               | Data access and cleaning methods |    | ..                                                                                                                                                                                                                                                                                                                                                                                                                                                                                                                                                                   |                    | RECORD 12.1: Authors should describe the extent to which the investigators had access to the database population used to create the study population. | Page 6, line 47-<br>page 7, line 10 |

|                  |    |                                                                                                                                                                                                                                                                                                                                                 |                                                            |                                                                                                                                                                                                                                                                                                                    |                   |
|------------------|----|-------------------------------------------------------------------------------------------------------------------------------------------------------------------------------------------------------------------------------------------------------------------------------------------------------------------------------------------------|------------------------------------------------------------|--------------------------------------------------------------------------------------------------------------------------------------------------------------------------------------------------------------------------------------------------------------------------------------------------------------------|-------------------|
|                  |    |                                                                                                                                                                                                                                                                                                                                                 |                                                            | RECORD 12.2: Authors should provide information on the data cleaning methods used in the study.                                                                                                                                                                                                                    |                   |
| Linkage          |    | ..                                                                                                                                                                                                                                                                                                                                              |                                                            | RECORD 12.3: State whether the study included person-level, institutional-level, or other data linkage across two or more databases. The methods of linkage and methods of linkage quality evaluation should be provided.                                                                                          | Not applicable    |
| <b>Results</b>   |    |                                                                                                                                                                                                                                                                                                                                                 |                                                            |                                                                                                                                                                                                                                                                                                                    |                   |
| Participants     | 13 | (a) Report the numbers of individuals at each stage of the study ( <i>e.g.</i> , numbers potentially eligible, examined for eligibility, confirmed eligible, included in the study, completing follow-up, and analysed)<br>(b) Give reasons for non-participation at each stage.<br>(c) Consider use of a flow diagram                          | Page 9, line 5-10                                          | RECORD 13.1: Describe in detail the selection of the persons included in the study ( <i>i.e.</i> , study population selection) including filtering based on data quality, data availability and linkage. The selection of included persons can be described in the text and/or by means of the study flow diagram. | Page 9, line 5-10 |
| Descriptive data | 14 | (a) Give characteristics of study participants ( <i>e.g.</i> , demographic, clinical, social) and information on exposures and potential confounders<br>(b) Indicate the number of participants with missing data for each variable of interest<br>(c) <i>Cohort study</i> - summarise follow-up time ( <i>e.g.</i> , average and total amount) | Page 9, line 5-35;<br>Page 10, line 29-44<br>Table 1 and 2 |                                                                                                                                                                                                                                                                                                                    |                   |
| Outcome data     | 15 | <i>Cohort study</i> - Report numbers of outcome events or summary measures over time<br><i>Case-control study</i> - Report numbers in each exposure                                                                                                                                                                                             | Page 12, line 54 to<br>Page 13 line 13<br>Table 4          |                                                                                                                                                                                                                                                                                                                    |                   |



|                   |    |                                                                                                                                                                                                                                                                                                                                                                                                                 |                                                |                                                                                                                                                                                                                                                                                                          |                   |
|-------------------|----|-----------------------------------------------------------------------------------------------------------------------------------------------------------------------------------------------------------------------------------------------------------------------------------------------------------------------------------------------------------------------------------------------------------------|------------------------------------------------|----------------------------------------------------------------------------------------------------------------------------------------------------------------------------------------------------------------------------------------------------------------------------------------------------------|-------------------|
|                   |    | category, or summary measures of exposure<br><i>Cross-sectional study</i> - Report numbers of outcome events or summary measures                                                                                                                                                                                                                                                                                |                                                |                                                                                                                                                                                                                                                                                                          |                   |
| Main results      | 16 | (a) Give unadjusted estimates and, if applicable, confounder-adjusted estimates and their precision (e.g., 95% confidence interval). Make clear which confounders were adjusted for and why they were included<br>(b) Report category boundaries when continuous variables were categorized<br>(c) If relevant, consider translating estimates of relative risk into absolute risk for a meaningful time period | Page 12, line 54 to Page 13 line 13<br>Table 4 |                                                                                                                                                                                                                                                                                                          |                   |
| Other analyses    | 17 | Report other analyses done— e.g., analyses of subgroups and interactions, and sensitivity analyses                                                                                                                                                                                                                                                                                                              | Page 12, line 54 to Page 13 line 13<br>Table 4 |                                                                                                                                                                                                                                                                                                          |                   |
| <b>Discussion</b> |    |                                                                                                                                                                                                                                                                                                                                                                                                                 |                                                |                                                                                                                                                                                                                                                                                                          |                   |
| Key results       | 18 | Summarise key results with reference to study objectives                                                                                                                                                                                                                                                                                                                                                        | Page 14 line 36-55                             |                                                                                                                                                                                                                                                                                                          |                   |
| Limitations       | 19 | Discuss limitations of the study, taking into account sources of potential bias or imprecision. Discuss both direction and magnitude of any potential bias                                                                                                                                                                                                                                                      | Page 17 line 5-36                              | RECORD 19.1: Discuss the implications of using data that were not created or collected to answer the specific research question(s). Include discussion of misclassification bias, unmeasured confounding, missing data, and changing eligibility over time, as they pertain to the study being reported. | Page 17 line 5-36 |
| Interpretation    | 20 | Give a cautious overall interpretation of results considering objectives,                                                                                                                                                                                                                                                                                                                                       | Page 17 line 38-53                             |                                                                                                                                                                                                                                                                                                          |                   |

|                                                           |    |                                                                                                                                                               |                    |                                                                                                                                                          |                    |
|-----------------------------------------------------------|----|---------------------------------------------------------------------------------------------------------------------------------------------------------------|--------------------|----------------------------------------------------------------------------------------------------------------------------------------------------------|--------------------|
|                                                           |    | limitations, multiplicity of analyses, results from similar studies, and other relevant evidence                                                              |                    |                                                                                                                                                          |                    |
| Generalisability                                          | 21 | Discuss the generalisability (external validity) of the study results                                                                                         | Page 17 line 5-36  |                                                                                                                                                          |                    |
| <b>Other Information</b>                                  |    |                                                                                                                                                               |                    |                                                                                                                                                          |                    |
| Funding                                                   | 22 | Give the source of funding and the role of the funders for the present study and, if applicable, for the original study on which the present article is based | Page 18 line 24    |                                                                                                                                                          |                    |
| Accessibility of protocol, raw data, and programming code |    | ..                                                                                                                                                            | Page 18 line 26-27 | RECORD 22.1: Authors should provide information on how to access any supplemental information such as the study protocol, raw data, or programming code. | Page 18 line 26-27 |

\*Reference: Benchimol EI, Smeeth L, Guttman A, Harron K, Moher D, Petersen I, Sørensen HT, von Elm E, Langan SM, the RECORD Working Committee. The REporting of studies Conducted using Observational Routinely-collected health Data (RECORD) Statement. *PLoS Medicine* 2015; in press.

\*Checklist is protected under Creative Commons Attribution ([CC BY](https://creativecommons.org/licenses/by/4.0/)) license.
