# Supplementary material for: Clinical outcomes and factors associated with pulmonary infarction following acute pulmonary embolism: a retrospective observational study at a US academic centre
Source: PubMed Central journal article supplement — BMJ Open. 2022 Dec 29;12(12):e067579. doi: 10.1136/bmjopen-2022-067579 (PMC9806066; doi:10.1136/bmjopen-2022-067579), 2022-12-29
Supplement: bmjopen-2022-067579supp001.pdf [file bmjopen-2022-067579supp001.pdf]

Supplemental material, table 1. Treatment and outcomes between patients with and without infarction.

|                            | All (496)  | Without infarction (353) | With infarction (143) | P-value |
|----------------------------|------------|--------------------------|-----------------------|---------|
| Anticoagulation alone      | 357 (72%)  | 259 (73%)                | 98 (69%)              | 0.545   |
| CDT                        | 70 (14%)   | 53 (15%)                 | 17 (12%)              | 0.365   |
| Thrombolysis               |            |                          |                       | 0.212   |
| Half dose                  | 25 (5%)    | 15 (4%)                  | 10 (7%)               |         |
| Full dose                  | 14 (3%)    | 8 (2%)                   | 6 (4%)                |         |
| Mechanical thrombectomy    | 19 (4%)    | 10 (3%)                  | 9 (6%)                | 0.069   |
| Surgical thrombectomy      | 9 (2%)     | 6 (2%)                   | 3 (2%)                | 0.763   |
| ECMO                       | 11 (2%)    | 6 (2%)                   | 5 (4%)                | 0.218   |
| Mechanical ventilation     | 48 (10%)   | 30 (9%)                  | 18 (13%)              | 0.163   |
| Antimicrobials             | 39 (8%)    | 19 (5%)                  | 22 (15%)              | <0.001  |
| In-hospital death          | 37 (8%)    | 27 (8%)                  | 10 (7%)               | 0.801   |
| Disposition                |            |                          |                       | 0.759   |
| Home                       | 349 (76%)  | 245 (75%)                | 104 (78%)             |         |
| ECF                        | 100 (22%)  | 74 (23%)                 | 26 (20%)              |         |
| Hospice                    | 10 (2%)    | 7 (2%)                   | 3 (2%)                |         |
| Length of stay, days       | 10±13.0    | 9.5±12.3                 | 10.7±14.7             | 0.698   |
| Bleeding complication      |            |                          |                       | 0.089   |
| Minor bleeding             | 31 (6%)    | 25 (7%)                  | 6 (4%)                |         |
| Major bleeding             | 32 (7%)    | 18 (5%)                  | 14 (10%)              |         |
| Need for transfusion       | 63 (13%)   | 41 (12%)                 | 22 (16%)              | 0.253   |
| Readmission within 30 days | 76 (16.6%) | 52 (16%)                 | 24 (18%)              | 0.584   |
| New O2 on discharge        | 75 (16%)   | 61 (19%)                 | 14 (11%)              | 0.031   |
| Pulmonary follow-up        | 199 (42%)  | 144 (44%)                | 55 (40%)              | 0.610   |

CDT= catheter-directed thrombolysis; ECMO= extracorporeal membrane oxygenation;  
ECF= extended care facility

Supplemental material, table 2. Outcomes and complication rates in CDT.

|                            | All (70) | Without infarction (53) | With infarction (17) | P-value |
|----------------------------|----------|-------------------------|----------------------|---------|
| In-hospital death          | 4 (6%)   | 3 (6%)                  | 1 (6%)               | 0.973   |
| Disposition                |          |                         |                      | 0.436   |
| Home                       | 57 (86%) | 42 (84%)                | 15 (94%)             |         |
| ECF                        | 9 (14%)  | 8 (16%)                 | 1 (7%)               |         |
| Length of Stay             | 9±14.2   | 7±8.4                   | 15±24.4              | 0.044   |
| Readmission within 30 days | 4 (6%)   | 1 (2%)                  | 3 (18%)              | 0.047   |
| New O2 on discharge        | 10 (16%) | 8 (17%)                 | 2 (12%)              | 0.609   |
| Pulmonary follow-up        | 47 (72%) | 38 (76%)                | 9 (56%)              | 0.166   |
| <b>Complications</b>       |          |                         |                      |         |
| Bleeding                   |          |                         |                      | 0.676   |
| Minor                      | 10 (14%) | 8 (15%)                 | 2 (12%)              |         |
| Major                      | 5 (7%)   | 3 (6%)                  | 2 (12%)              |         |
| RBC transfusion            | 10 (14%) | 7 (13%)                 | 3 (18%)              | 0.649   |
| Access site hematoma       | 3 (5%)   | 1 (2%)                  | 2 (13%)              | 0.134   |

ECF= extended care facility; RBC= red blood cell
